1  
2  
3  
4  
5  
6  
7  
8  
9  
10  
11  
12  
13  
14  
15  
16  
17  
18  
19  
20  
21  
22  
23  
24  
25  
26  
27  
28

**Insulin secretion deficits in a Prader-Willi syndrome  $\beta$ -cell model are associated with a concerted downregulation of multiple endoplasmic reticulum chaperones**

Erik A. Koppes<sup>1</sup>, Marie A. Johnson<sup>1</sup>, James J. Moresco<sup>2,#</sup>, Patrizia Luppi<sup>3</sup>, Dale W. Lewis<sup>4</sup>,  
Donna B. Stolz<sup>3</sup>, Jolene K. Diedrich<sup>2</sup>, John R. Yates III<sup>2</sup>, Ronald C. Wek<sup>5</sup>, Simon C.  
Watkins<sup>3</sup>, Susanne M. Gollin<sup>4</sup>, Hyun J. Park<sup>4</sup>, Peter Drain<sup>3</sup>, Robert D. Nicholls<sup>1</sup>

<sup>1</sup> Division of Genetic and Genomic Medicine, Department of Pediatrics, UPMC Children's Hospital of Pittsburgh, Pittsburgh, PA 15224; <sup>2</sup> Department of Molecular Medicine and Neurobiology, The Scripps Research Institute, La Jolla, CA 92037; <sup>3</sup> Department of Cell Biology, University of Pittsburgh School of Medicine, Pittsburgh, PA 15261; <sup>4</sup> Department of Human Genetics, University of Pittsburgh School of Public Health, Pittsburgh, PA 15261; <sup>5</sup> Department of Biochemistry and Molecular Biology, Indiana University School of Medicine, Indianapolis, IN 46202

Address correspondence to R.D.N.:  
Dr. Robert D. Nicholls, Department of Pediatrics, UPMC Children's Hospital of Pittsburgh, Rangos Research Building, 4401 Penn Avenue, Pittsburgh, PA 15224; [robert.nicholls@chp.edu](mailto:robert.nicholls@chp.edu); Tel., 1-412-692-7855; Fax, 1-412-692-7816.

# Current address: Center for Genetics of Host Defense, UT Southwestern Medical Center, Dallas, TX

**Keywords:** CRISPR/Cas9; genomic imprinting; hormone secretion; metabolic disease; pancreatic islet

29 **ABSTRACT**

30 Prader-Willi syndrome (PWS) is a multisystem disorder with neurobehavioral,  
31 metabolic, and hormonal phenotypes, caused by loss of expression of a paternally-  
32 expressed imprinted gene cluster. Prior evidence from a PWS mouse model identified  
33 abnormal pancreatic islet development with retention of aged insulin and deficient insulin  
34 secretion. To determine the collective roles of PWS genes in  $\beta$ -cell biology, we used  
35 genome-editing to generate isogenic, clonal INS-1 insulinoma lines having 3.16 Mb  
36 deletions of the silent, maternal (control) or active, paternal PWS-alleles. PWS  $\beta$ -cells  
37 demonstrated a significant cell-autonomous reduction in basal and glucose-stimulated  
38 insulin secretion. Further, proteomic analyses revealed reduced levels of cellular and  
39 secreted hormones, including all insulin peptides and amylin, concomitant with reduction  
40 of at least ten endoplasmic reticulum (ER) chaperones, including GRP78 and GRP94.  
41 Critically, transcriptomic studies demonstrated that the broad reduction of ER chaperones  
42 originated from transcriptional downregulation without corresponding changes for *Ins1*  
43 and *Ins2*. In contrast to the dosage compensation previously seen for ER chaperones in  
44 *Grp78* or *Grp94* gene knockouts or knockdown, compensation is precluded by the stress-  
45 independent deficiency of ER chaperones in PWS  $\beta$ -cells. Consistent with reduced ER  
46 chaperones levels, PWS INS-1  $\beta$ -cells are more sensitive to ER stress, leading to earlier  
47 activation of all three arms of the unfolded protein response. These findings suggest that  
48 a chronic shortage of ER chaperones in PWS  $\beta$ -cells leads to a deficiency of protein  
49 folding and/or delay in ER transit of insulin and other cargo. In summary, our results  
50 illuminate the pathophysiological basis of pancreatic  $\beta$ -cell hormone deficits in PWS, with  
51 evolutionary implications for the multigenic PWS-domain, and indicate that PWS-

52 imprinted genes coordinate concerted regulation of ER chaperone biosynthesis and  $\beta$ -  
53 cell secretory pathway function.

54

55

## 56 **Abbreviations**

57 ddPCR, droplet digital PCR; DEGs , differentially expressed genes; ER, endoplasmic  
58 reticulum; FISH, fluorescence *in situ* hybridization; GRN, gene regulatory network; GSIS,  
59 glucose-stimulated insulin secretion; INS-1, INS-1 (832/13)::mCherry insulinoma cells;  
60 PWS, Prader-Willi syndrome; PWS-IC, Prader-Willi syndrome imprinting center; RNA-  
61 seq, RNA sequencing; RT-PCR, reverse-transcription-PCR; RT-ddPCR, reverse-  
62 transcription droplet digital PCR; TgPWS, transgenic-PWS mouse; TFs, transcription  
63 factors; UPR, unfolded protein response.

## 64 INTRODUCTION

65 Prader-Willi syndrome (PWS) is a multisystem disorder caused by loss of  
66 expression of a large contiguous cluster of paternally-expressed, imprinted genes from  
67 human chromosome 15q11.2 [1-3]. Clinically, PWS is characterized by failure to thrive  
68 with hypotonia, developmental and cognitive delay, behavioral problems, short stature,  
69 hypogonadism, hyperphagia, and early-onset obesity [3, 4]. Prominent endocrine  
70 features of PWS include deficiencies of multiple hormones, including growth hormone,  
71 oxytocin, gonadotropins, insulin-like growth factor, thyroid hormones, amylin/IAPP, and  
72 pancreatic polypeptide [1, 4-9]. In addition, plasma insulin is lower than expected in PWS  
73 relative to the degree of obesity [10-12]. Episodes of hypoglycemia have been reported  
74 in PWS patients, suggesting an imbalance in glucose homeostasis [13, 14]. In contrast,  
75 plasma ghrelin is grossly elevated in PWS [3, 10, 15], perhaps as a physiological  
76 response to glucose imbalance [16, 17]. Although the PWS literature suggests a  
77 hypothalamic etiology [3], the mechanisms for endocrine and metabolic dysfunction in  
78 PWS have not been elucidated.

79 The PWS-imprinted domain is comprised of ten paternally-expressed imprinted  
80 genes conserved in human and rodents (with an additional two genes each unique to  
81 human and rodents), encoding lncRNAs, snoRNAs, miRNAs, or distinct proteins [1, 2,  
82 18-23]. These imprinted genes are predominantly expressed in neuronal [19, 21, 24] and  
83 neuroendocrine lineages [23], as well as pancreatic endocrine cells ( $\alpha$ -,  $\beta$ -,  $\delta$ -, and  $\gamma$ -  
84 cells, with only low expression in acinar, ductal, or undefined cells) based on recent gene-  
85 specific [25] and single cell RNA sequencing studies [26-28]. Further, *SNRPN* has  
86 decreased islet expression in  $\beta$ -cell failure due to saturated fatty acids [29] or cytokines  
87 [30], while *SNORD116* and *SNORD107* occur in islet exosomes and decrease by IL-1 $\beta$

88 and IFN- $\gamma$  treatment [31]. Finally, *SNORD116* RNA levels are greatly reduced in MODY3  
89  $\beta$ -cells [32]. These observations suggest that PWS-gene products function in the  
90 endocrine pancreas including in  $\beta$ -cells.

91 Our earlier studies of a transgenic-PWS (TgPWS) mouse model harboring a  
92 deletion of the orthologous PWS-imprinted domain demonstrated severe failure to thrive,  
93 abnormalities in fetal pancreatic islet development and architecture, reduced  $\alpha$ - and  $\beta$ -  
94 cell mass, increased apoptosis, and postnatal onset of progressive hypoglycemia that led  
95 to lethality within the first postnatal week [16, 25]. Plasma insulin and glucagon levels  
96 were low during fetal and neonatal life of TgPWS mice [16, 25], and, at postnatal day 1  
97 prior to onset of hypoglycemia, there was significantly reduced basal and glucose-  
98 stimulated insulin secretion (GSIS) from cultured TgPWS islets [25]. Furthermore, using  
99 an insulin-Timer fluorescent protein biomarker to image postnatal day 1  $\beta$ -cells *in vivo*,  
100 TgPWS mice showed a striking accumulation of aged insulin whereas wildtype control  
101 littermates only displayed newly synthesized insulin [25]. These results suggested that  
102 PWS-imprinted genes are required for the development and secretory function of  
103 pancreatic endocrine cells.

104 Based on the salient insulin secretion dysfunction in the PWS-mouse model [25],  
105 we sought to assess the role of PWS genes in pancreatic  $\beta$ -cell secretory pathway  
106 function in a cellular model system. Herein, we used CRISPR/Cas9 genome editing within  
107 the INS-1(832/13) insulinoma ( $\beta$ )-cell line [33] to generate deletions of the complete PWS-  
108 domain. Following validation of a cell-autonomous insulin secretion deficit in the PWS  
109 INS-1 model, we performed molecular profiling by proteomic and transcriptomic  
110 approaches. The data revealed deficits in multiple secreted hormones as well as  
111 endoplasmic reticulum (ER) chaperones that are components of secretory protein folding

112 and trafficking pathways [34-39], providing mechanistic insight into PWS-gene function in  
113 pancreatic  $\beta$ -cells.

## 114 RESULTS

115

### 116 Generation of INS-1 cell lines with silent, maternal allele PWS-gene deletions

117 Various insulinoma cell lines, predominantly of rodent origin, are widely utilized to  
118 investigate  $\beta$ -cell mechanisms as a tractable *in vitro* model system [40]. To investigate  
119 the functions of PWS-genes in  $\beta$ -cells, we used CRISPR/Cas9 genome-editing to target  
120 3.16 Mb deletions encompassing the PWS-genes (**Fig. 1A**; **Fig. S1A**) in rat INS-  
121 1(832/13)::mCherry insulinoma cells (hereafter termed INS-1) that secrete rat and human  
122 insulin [33] and express a mouse *Ins2* C-peptide-mCherry biosensor in insulin secretory  
123 granules [41]. The large deletions were visualized in about 9% of unselected, transfected  
124 cells as determined by fluorescence *in situ* hybridization (FISH) (**Fig. S1B**). INS-1 lines  
125 with PWS-domain deletions were derived through sequential targeting and clonal isolation  
126 of cell lines initially harboring deletions of the silent maternal allele, followed by targeting  
127 of the remaining paternal loci, culminating in the creation of homozygous PWS-deletion  
128 lines (**Fig. 1B**).

129 This process first led to isolation of two lines with a PWS-region deletion (5-5, 5-9)  
130 identified by deletion-breakpoint PCR (**Fig. 1C**) and DNA sequencing (**Fig. S2A,B**), and  
131 confirmed by FISH using BAC probes from within and outside the PWS-domain (**Fig.**  
132 **S1C-F**). One PWS allele was deleted in all interphase and metaphase cells of line 5-5  
133 (**Fig. S1D**), indicating clonal isolation of a cell line with a PWS-domain deletion. Initially,  
134 line 5-9 was more complex, as FISH showed two cell types with either no deletion (most  
135 cells) or a PWS-domain deletion (**Fig. S1E**); additionally, similar proportions of cells  
136 lacked mCherry fluorescence, likely due to epigenetic silencing (as DNA analysis  
137 indicated the transgene was present) or were mCherry-positive, respectively. This

138 allowed separation by fluorescence-activated cell sorting (FACS), with establishment of  
139 a clonal mCherry-positive cell line (5-9) harboring a PWS-domain deletion (**Fig. S1F**).  
140 Clonal engineered cell lines 5-5 and 5-9 were inferred to have maternal-deletions of the  
141 rat PWS-domain as evidenced by **1)** detection of only an unmethylated allele at the PWS-  
142 imprinting center (PWS-IC) by bisulfite PCR whereas parental INS-1 and control lines had  
143 biparental DNA methylation (**Fig. 1D**); and **2)** expression of PWS-imprinted loci by  
144 reverse-transcription-PCR (RT-PCR) (**Fig. S1G**), indicating the presence of an active,  
145 paternal-allele (**Fig. S1H**). Finally, the presence of mutations at sgRNA target sites on the  
146 intact, paternal chromosome, termed scarred mutation alleles, identified a single  
147 nucleotide insertion at the sgRNA1 site (**Fig. S1I; Fig. S2C-E**) but different nucleotide  
148 insertions at the sgRNA3 site (**Fig. S1I; Fig. S2F-H**), the latter indicating an independent  
149 origin for the cell lines, 5-5 and 5-9. In contrast, no sequence changes occurred at top-  
150 ranked off-target sites for sgRNA1 or sgRNA3 (**Fig. S3**).

151

### 152 **Generation of PWS INS-1 cell lines with deletions on the active paternal allele**

153 To specifically target the paternal allele of lines 5-5 and 5-9, we used rat-specific  
154 sgRNA sets internal to the first targeting sites to generate slightly smaller 3.143 Mb PWS-  
155 deletions (**Fig. S4A-C**). The use of FISH demonstrated that about 5% of unselected,  
156 transfected cells had a PWS-deletion (**Fig. S4D**). We chose maternal deletion (control)  
157 line 5-9 for a second round of transfections and clonal isolation, generating control lines  
158 2 and 16 (**Fig. 1B,E; Fig. S4E,F**) as well as PWS lines 19 and 25, with an expected  
159 paternal deletion-PCR product and PWS line 3 with a larger than expected deletion-PCR  
160 product (**Fig. 1B,E; Fig. S4G**). DNA sequencing confirmed PWS-deletion breakpoints for  
161 lines 19 and 25 (**Fig. S5A-C**) as well as for line 3, although the latter arose from a larger



162 deletion at an alternate (alt) proximal alt-sgRNA70-3 targeting site with a DNA repair event  
163 that inserted a fragment of *E. coli* DNA in the breakpoint junction (**Fig. S5D**). FISH studies  
164 confirmed that lines 3 and 25 had deletions of the PWS-domain on each allele (**Fig.**  
165 **S4H,I**); however, FISH analysis also revealed that line 25 was mosaic for cells with diploid  
166 or tetraploid PWS-signals (**Fig. S4I**). Consequently, line 25 was not used further. In  
167 contrast, line 19 had a residual fraction of cells (1-3.7%) with an intact paternal allele as  
168 shown by FISH (**Fig. S4J**) and droplet digital PCR (ddPCR) (**Fig. S6**) which was removed  
169 by cell dilution and isolation of five clonal lines 19-1 through 19-5 (**Fig. 1B; Fig. S4K,L;**  
170 **Fig. S10A**). Finally, sgRNA target sites not deleted or involved in a deletion breakpoint  
171 were assessed for scarred mutation alleles identifying a 28-nt deletion at alt-sgRNA70-3  
172 in PWS lines 19-1 and 19-4 (**Fig. S4N; Fig. S5E-L**), while no sequence changes occurred  
173 at top-ranked off-target sites for sgRNA70-3 (**Fig. S7**) or sgRNA79-1 (**Fig. S8**).

174 Genomic copy number was confirmed by ddPCR (**Fig. 1F; Fig. S6; Fig. S9**),  
175 establishing a set of three control lines (5-9, 2, 16) with hemizyosity for maternal-allele  
176 deletions (**Fig. S1H**) and three PWS INS-1 lines (3, 19-1, 19-4) with homozygosity for  
177 PWS-domain deletions (**Fig. S4M**). An absence of PWS-gene expression in all PWS lines  
178 was shown by RT-PCR for each PWS-imprinted gene (**Fig. 1G; Fig. S10A,B**) and by  
179 western blot analysis for the SmN polypeptide encoded by *Snrpn* (**Fig. 1H**). Intriguingly,  
180 PWS INS-1 lines showed a very low level of apparent expression of the PWS-imprinted  
181 gene *Snurf* by RT-PCR (**Fig. S10A; Fig. S11A,B**). Sequencing of the RT-PCR products  
182 identified an expressed  $\psi$ *Snurf* sequence within a recently evolved  $\psi$ *Snurf*- $\psi$ *Snrpn* locus  
183 located in an intron of the *Mon2* gene (**Fig. S11B,C**). Using a *Pml* variant between *Snurf*  
184 and  $\psi$ *Snurf* (**Fig. S11D**), we confirmed expression specifically of  $\psi$ *Snurf* with complete

185 silencing of *Snurf* (**Fig. S11B**), as expected for PWS INS-1 lines. Scattered mutations in  
186 the  $\psi$ *Snurf* (**Fig. S11D**) and  $\psi$ *Snrpn* (**Fig. S11E,F**) segments likely inactivate any coding  
187 potential (**Fig. S11G, H**). In summation, these results establish a panel of clonal INS-1  
188 lines homozygous for ~ 3.16 Mb deletions, also termed PWS  $\beta$ -cell lines, and similarly, of  
189 clonal control lines with a deletion only involving the silent, maternal allele.

190

### 191 **PWS INS-1 cell lines show deficits in insulin secretion and ER chaperones**

192 To determine whether PWS INS-1 cell lines have secretory deficits, we carried out  
193 insulin secretion assays under low (2.2 mM) and high (22 mM) glucose conditions. The  
194 three PWS cell lines displayed a striking deficit in both basal and glucose-induced insulin  
195 secretion as compared to the isogenic control INS-1 lines (**Fig. 2**). However, both the  
196 PWS and control cell lines had a similar increase from each basal level for GSIS (**Fig. 2**),  
197 indicating that PWS  $\beta$ -cells were not deficient in glucose responsiveness.

198 Next, mass spectrometry was used to assess changes in the cellular proteome  
199 and all secreted peptides in PWS vs. control INS-1 cell lines, under insulin secretion  
200 conditions of 22 mM glucose, separating cellular proteins by methanol-acetic acid  
201 extraction into soluble (mostly small) and insoluble (mostly large) protein fractions with  
202 the latter analyzed by quantitative proteomics (**Fig. 3A**). Unexpectedly, in PWS INS-1  
203 cells there was a striking deficiency of multiple ER chaperone proteins, including  
204 GRP78/BiP (HSPA5), GRP94/endoplasmic (HSP90B1), PDIA4, HYOU1, CRELD2, and  
205 DNAJB11, with lesser reductions in SDF2L1, DNAJC3, PDIA6, and PDIA3, and a modest  
206 decrease in PPIB (**Fig. 3B**). Similar deficits of residual amounts of many of these ER  
207 chaperones as well as MANF were detected in the soluble protein fraction (**Fig. 3C**).  
208 Furthermore, in PWS  $\beta$ -cell lines there was reduced abundance of numerous hormones

209 co-secreted from INS-1 cells, including rat insulin-1 and insulin-2, mouse insulin-2, and  
210 human insulin (pre-pro-, pro-, C-peptide, and mature versions of each), as well as  
211 reductions in processed and precursor forms of IAPP and NPY, detected in both the  
212 cellular small protein fraction (**Fig. 3C**) and residual amounts in the large protein fraction  
213 by quantitative proteomics (**Fig. 3B**). In contrast, the full-length secretory granule protein,  
214 chromogranin B (CHGB), and the C-terminal CHGB (CCB)-peptide were increased 2-fold  
215 (**Fig. 3B,C**). Extending both the insulin secretion data (**Fig. 2**) and the cellular protein  
216 deficiencies (**Fig. 3B,C**), mass spectrometry analysis of peptides secreted into the culture  
217 media demonstrated reduced levels of all forms of insulins and IAPP in PWS  $\beta$ -cell media  
218 compared to control (**Fig. 3D**). There was also a reduction in secreted levels of the 14  
219 amino acid WE14 peptide processed from chromogranin A (CHGA), but no changes in  
220 the CHGA precursor and processed forms in either secreted or cellular fractions.  
221 Secreted levels of chromogranin B were increased in PWS (**Fig. 3D**), further illustrating  
222 the concordance between cellular and secreted peptide levels in PWS vs. control INS-1  
223 lines. These results indicate that deletion of PWS-genes sharply lowers secretion of  
224 insulin and other peptide hormones (IAPP, NPY, CHGA-WE14) and this reduction is  
225 associated with deficiencies in many ER chaperones.

226

### 227 **Reduced mRNA levels for hormones and ER chaperones in PWS INS-1 cell lines**

228 Many of the PWS-imprinted genes (**Fig. 1A**) are suggested to function in gene  
229 expression [18, 19, 21, 22, 42, 43]. To gain insight into the molecular basis for insulin  
230 secretion and ER chaperone deficits in PWS INS-1 lines, high-throughput total RNA  
231 sequencing (RNA-seq) was used to identify differentially expressed genes (DEGs) (**Fig.**

232 **4A-C; Tables S1,S2**). Visualization by a heatmap clustergram (**Fig. 4A**) indicates that  
233 PWS clonal lines and control clonal lines each grouped together with similar expression  
234 profiles. A volcano plot depicting the magnitude, direction, and statistical significance of  
235 DEGs in the 3 PWS vs. 3 control lines illustrates no appreciable expression (Log2 Fold  
236 Change < -5) of PWS-imprinted genes with remaining DEGs symmetrically orientated  
237 around the ordinate axis with a near equivalent number of significantly upregulated (105)  
238 and downregulated (123) genes (**Fig. 4B**). The PWS transcripts with complete loss of  
239 expression specifically in PWS INS-1 lines include *Snurf*, *Snrpn*, *lpw*, *Mkrn3*, all four  
240 snoRNAs (*Snord116*, *Snord115*, *Snord107* and *Snord109*), miRNA (*Mir344* isoforms),  
241 and duplicated U1-*Snurf* sequences (**Fig. 4B**), as also seen by RT-PCR (**Fig. 1G; Fig.**  
242 **S10A,B; Fig. S11A,B**). Three PWS-imprinted genes, *Ndn*, *Magel2*, and *Frat3* (*Peg12*),  
243 were not detected as DEGs as these are not expressed by RT-PCR or RNA-sequencing  
244 in any of parental, control, or PWS INS-1 lines. These loci are present by genomic PCR,  
245 suggesting an epigenetic inactivation in the INS-1 founder cell line, although silencing is  
246 not widespread, as *Mkrn3* and *Mir-344* are interspersed with the silenced loci (see **Fig.**  
247 **1A**) and are well-expressed in control INS-1 lines (**Fig. S10B; Fig. S12**).

248 To ensure complete coverage of the INS-1 transcriptome, RNA-seq of small stable  
249 RNAs in the PWS vs. control cell lines was carried out, culminating in the identification of  
250 58 significant differentially expressed miRNAs and snoRNAs (**Fig. S12A,B; Table S3**).  
251 Congruent with the RNA-seq data, all but three correspond to PWS-imprinted small  
252 RNAs, including duplicated *MiR-344*, *Snord116* and *Snord115* loci, as well as single copy  
253 *Snord107* and *Snord64* loci (**Fig. S12A,B**). In addition, *Mir135b*, *Mir3065*, and *Mir212*  
254 were downregulated in PWS INS-1 lines (**Fig. S12B**), although predicted targets were not

255 DEGs by RNA-seq. Eleven of the top 25 highly expressed miRNAs in the rat INS-1  $\beta$ -cell  
256 model (**Table S4**), including *Mir375*, *Mir148a*, *Mir183*, *Mir30d*, *Mir27b*, *Mir25*, *Mir26a2*,  
257 *Mir26a*, *Mir192*, *Mir125a*, and *Mir141* are also in the top 25 expressed miRNAs for a  
258 human  $\beta$ -cell model [44]. Within INS-1 cells, expression of PWS-region *Snord116* copies  
259 make up 13.8% of the top 188 highly expressed snoRNAs and cumulatively would be the  
260 thirteenth highest expressed, with *Snord64* also in and *Snord107* just outside the top 100  
261 (**Table S5**), although snoRNAs are poorly studied as a small RNA class.

262 In addition to the loss of PWS-imprinted gene expression in the PWS INS-1 lines,  
263 four additional classes of DEGs were identified by manual annotation analysis of RNA-  
264 seq data (**Fig. 4B**). These DEG classes encoded: **1**) hormones (e.g., *lapp*, *Npy*,  
265 *mIns2::mCherry*) that were significantly reduced; **2**) nine ER chaperones that were  
266 lowered including *Sdf2l1*, *Hspa5*, *Creld2*, *Dnajb11*, *Hyou1*, *Pdia4*, *Dnajc2*, *Hsp90b1*, and  
267 *Pdia6*; **3**) “neuronal active zone” proteins that had increased expression, including  
268 *Cacna1a*, *Rph3al*, *Bsn*, *Rimbp2*, *Cacna1d*, *Pclo*, and *Chgb*, many of which also play a  
269 role in insulin exocytosis [45-50]; and **4**) two related transmembrane proteins involved in  
270 vesicle acidification (*Tmem176a,b*) [51] whose expression were also enhanced. Gene  
271 ontology and pathway analysis of downregulated genes (excluding PWS-imprinted  
272 genes) through Enrichr or DAVID highlighted enrichment of multiple ER functional groups  
273 including those in ER protein processing, and the unfolded protein response (UPR) that  
274 are linked with both IRE1 and ATF6 (**Fig. 4C**; **Fig. S13A-C**). Finally, based on the input  
275 of downregulated DEGs, Enrichr predicted potential upstream transcriptional regulatory  
276 factors, including NFYA/NFYB (a cofactor of ATF6 $\alpha$ , hereafter ATF6), CPEB1, RFX5,  
277 IRF3, CREB1, SREBF1, XBP1, and PPARB/D (**Fig. S14**).

278           Transcriptional changes observed by RNA-seq were corroborated by RT-droplet  
279 digital PCR (RT-ddPCR) analyses using RNA from independent biological replicates of  
280 each PWS and control INS-1 line (**Fig. 4D-H; Fig. S15; Fig. S16**). We validated equal  
281 expression of the housekeeping gene, *Gapdh*, and loss of expression of *Snord116* (**Fig.**  
282 **4D**), as well as significant down-regulation in PWS INS-1 lines of 10 genes encoding ER  
283 chaperones (**Fig. 4E**: *Hspa5*, *Hsp90b1*, *Pdia4*, *Pdia6*, *Ppib*, *Creld2*, *Sdf2l1*, *Dnajb11*,  
284 *Dnajc3*, and *Hyou1*), of endogenous hormones (**Fig. 4F**: *Npy*, *Iapp*), and of the mouse  
285 *Ins2-mCherry* transgene (**Fig. 4G**). Further, another eight downregulated genes in PWS  
286  $\beta$ -cells were verified (**Fig. S16**) including *Syt1*, encoding a  $Ca^{2+}$ -sensor [52] and *Jph3*,  
287 encoding a junctophilin involved in ER-plasma membrane contact bridges [53]; each with  
288 roles in insulin secretion [52, 53]; *Derl3*, involved in ER-associated degradation (ERAD)  
289 [54], *Mylip*, encoding an E3 ubiquitin ligase regulating the LDL receptor [55], *Atp10a*,  
290 encoding a lipid flippase [56], and *Tap1* and *Tap2*, encoding ER antigenic peptide  
291 transporters that play a role in type 1 diabetes [57]. Additionally, up-regulation of four  
292 genes was confirmed by RT-ddPCR (**Fig. 4H**), including *Cacna1a*, *Chgb*, *Tmem176a*,  
293 and *Tmem176b*.

294           Several other observations merit note. In contrast to the proteomics data wherein  
295 all endogenous forms of insulin were decreased in PWS INS-1 lines, neither rat *Ins1* nor  
296 *Ins2* mRNA levels were statistically different between PWS and control lines in the RNA-  
297 seq or RT-ddPCR (**Fig. 4F**) expression profiling. Only a minority of DEGs identified by  
298 RNA-seq did not validate by RT-ddPCR, including several encoding neuronal active zone  
299 proteins (**Fig. S16**), possibly arising from cell culture media differences between biological  
300 replicates. Additionally, an apparent increase in expression of the human *INS-neoR*  
301 transgene in PWS lines (**Fig. 4G**) was an artifactual consequence of epigenetic silencing

302 of the transgene, specifically in control line 16 (**Fig. S15A,I-K,M**). Interestingly, although  
303 both mRNA (*Pcsk1*) and protein levels of prohormone convertase PC1 were reduced in  
304 iPSC-derived neurons from PWS patients and in whole islets of inbred *Snord116*-deficient  
305 mice [23, 58], neither PC1 protein nor *Pcsk1* mRNA levels were changed in PWS INS-1  
306 cell lines (**Fig. 4F**). Finally, no markers of activation of apoptotic or other cell death  
307 pathways were observed by RNA-seq or proteomics, consistent with the absence of any  
308 increase in cell death observed in cultured PWS or control INS-1 cells. Indeed, electron  
309 microscopy showed normal mitochondria, rough ER, and other subcellular organelles in  
310 PWS and control INS-1 lines (**Fig. S17**). The difference in observations *in vivo* where  
311 increased apoptosis was observed in a subset of  $\alpha$ - and  $\beta$ -cells in TgPWS fetal islets [25]  
312 and *in vitro* (this study) may reflect the use of enriched culture medium with reduced  
313 cellular stress under cell culture conditions. In summary, the transcriptome studies show  
314 that loss of PWS-gene expression in PWS  $\beta$ -cell lines is accompanied by widespread  
315 alterations in mRNA levels most notably encoding secreted peptides and ER chaperones.

316

### 317 **Confirmation of insulin and ER chaperone protein deficits in PWS INS-1 lines**

318 To further address the predicted disruptions of the ER and secretory pathway, we  
319 used western blot analyses to measure cellular levels of insulin and ER chaperones in  
320 control and PWS INS-1 lines. Levels of numerous forms of insulin polypeptides detected  
321 by an anti-insulin antibody were each significantly decreased in PWS INS-1 lines  
322 compared to controls, including diminished amounts of pro-insulin, pre-pro-insulin, and  
323 pro-mInsulin-2::mCherry bands (**Fig. 5A,D**). Additionally, using an anti-mCherry antibody,  
324 we observed that PWS cells have significantly lower levels of the proinsulin form of the  
325 mouse insulin2-mCherry transgene but no decrease in the processed C-peptide (CP)

326 form (**Fig. 5B,E**). Indeed, confocal microscopy of the processed CP-mCherry shows  
327 punctate cytoplasmic compartmentalization without a discernable difference between  
328 PWS and control INS-1 lines (**Fig. S18**). Importantly, use of a KDEL antibody to identify  
329 proteins with the ER retention motif confirmed significant deficiencies in levels of the two  
330 major ER chaperone proteins, GRP78/BiP and GRP94, in PWS INS-1 cell lines (**Fig.**  
331 **5C,F**). These results indicate that there are major disruptions of the protein folding  
332 machinery and attendant reductions in insulin processing and secretion in the PWS INS-  
333 1 cells.

334

### 335 **PWS INS-1 cells are more sensitive to activation by ER stressors**

336 Chaperones, such as GRP78 and GRP94, not only have essential roles in protein  
337 folding and trafficking in the ER but disruptions of chaperone functions sensitize cells to  
338 agents that stress this organelle [59-64]. Therefore, we assessed whether the PWS INS-  
339 1 lines and their reduced levels of ER chaperones (**Fig. 3-5**) would accentuate activation  
340 of the three sensory proteins of the UPR. First, ER stress activates IRE1 $\alpha$  to catalyze  
341 mRNA processing of the *Xbp1* mRNA to generate the functional XBP1 transcription factor  
342 [64]; this non-canonical “splicing” of *Xbp1* transcripts occurs at low and equal levels in  
343 PWS and control INS-1 cells under DMSO control growth conditions but is enhanced by  
344 treatment with thapsigargin to initiate ER stress (**Fig. 6A,D; Fig. S19A,B**). Importantly,  
345 production of “spliced” *Xbp1* mRNA in thapsigargin-treated cells occurs significantly more  
346 robustly at earlier 2 h and 3 h timepoints for PWS than for control INS-1 lines (**Fig. 6A,D;**  
347 **Fig. S19A,B**) but normalizes by 4-5 h (**Fig. S19A,B**). These results reveal that while the  
348 initial magnitude of IRE1 activation is greater in the PWS INS-1 cells, the duration and  
349 cumulative response is comparable. Second, phosphorylation of eIF2 $\alpha$  by PERK [63] was



350 assessed, with PWS INS-1 lines showing significantly higher levels of eIF2 $\alpha$  pSer51  
351 phosphorylation than control lines when ER stress was induced by 5 h of thapsigargin  
352 treatment (**Fig. 6B,E**). Phosphorylated eIF2 $\alpha$  inhibits general translation but preferentially  
353 translates certain stress adaptive genes, including ATF4 and CHOP; transcripts of these  
354 genes were unaffected in unstressed PWS INS-1 cells as measured by RNA-seq.

355 Third, dissociation of ER-retained ATF6 from GRP78 by ER stressors such as de-  
356 glycosylation agents [60, 61] enable it to move to the Golgi, where it is processed to an  
357 activated nuclear (N) form, ATF6-N, which regulates expression of genes encoding many  
358 ER chaperones, including GRP78 and others. In PWS and control INS-1 cells, ER stress  
359 induced by tunicamycin, as expected, de-glycosylates full-length glycosylated (FL-G)  
360 ATF6 of ~ 102-kD to an unglycosylated 90-kD (FL-UG) form and the processed ATF6-N  
361 form of 55-kD (**Fig. 6C; Fig. S20A**). The loss of the ATF6 FL-G form by deglycosylation  
362 occurs at the same rate for PWS and control cell lines (**Fig. S20B**). However, the ratio of  
363 the processed ATF6-N (due to higher production in PWS than control INS-1 cells) to full-  
364 length unglycosylated 90-kD (with a higher level in control than PWS INS-1 cells) is  
365 significantly greater for PWS compared to control INS-1 cells at 2-5 h timepoints (**Fig.**  
366 **6C,F**; also see **Fig. S20A,B**). Thus, ATF6 is being activated to ATF6-N earlier and more  
367 robustly in PWS than in control INS-1  $\beta$ -cell lines. Combined, these results on ER stress  
368 activation of the IRE1 $\alpha$ /XBP1, PERK/eIF2 $\alpha$ , and ATF6-N pathways indicate that PWS  
369 INS-1  $\beta$ -cells are more sensitive than control INS-1  $\beta$ -cells to ER stressors.

## 370 **DISCUSSION**

371           Although PWS has long been assumed to be a neuroendocrine disease of the  
372 hypothalamus [3, 23], studies using mouse models have implicated a role for the  
373 pancreatic endocrine system [25, 58]. Here, we generated a novel INS-1  $\beta$ -cell model  
374 through deletion of the ~ 3.16 Mb PWS-orthologous imprinted domain in which to  
375 investigate PWS  $\beta$ -cell biology. The PWS deletion results in a  $\beta$ -cell autonomous defect  
376 in both basal and regulated insulin secretion, although the latter is at least in part  
377 consequent to the effect on basal insulin secretion. The PWS deletion also results in cell  
378 autonomous deficits in the secretion of other peptide hormones and in deficiencies of  $\beta$ -  
379 cell ER chaperones required for folding, exit and trafficking of secretory peptides.  
380 Presciently, studies reported 25 years ago demonstrated that PWS adults compared to  
381 matched obese controls had significantly reduced first- and second-phase insulin  
382 secretion during intravenous glucose tolerance tests [11], attesting to the translational  
383 impact of the PWS INS-1 model. These findings strongly support a hypothesis that PWS-  
384 genes are required for fundamental  $\beta$ -cell mechanisms affecting production of peptide  
385 hormones.

386

### 387 **PWS $\beta$ -cells have concerted deficits in ER chaperone expression and insulin** 388 **production/secretion**

389           Basal insulin secretion and GSIS are dramatically reduced both *in vivo* in the  
390 TgPWS-deletion mouse model [25] and the new *in vitro* PWS INS-1  $\beta$ -cell model. As PWS  
391  $\beta$ -cells in both models are glucose-responsive this indicates the defect is in a fundamental  
392 component of the secretory apparatus. In TgPWS mice, perinatal pancreatic insulin

393 secretion dysfunction was associated with intracellular retention of aged insulin and  
394 reduced islet insulin and C-peptide content as well as reduced islet glucagon content and  
395 plasma glucagon levels suggestive of broader endocrine cell dysfunction [25]. Extending  
396 these observations, in our current study we have found that all insulin isoforms that are  
397 expressed in and secreted from the PWS INS-1  $\beta$ -cell are decreased, as measured by  
398 proteomics and western blot analyses. Remarkably, these equivalent insulin secretion  
399 deficits between PWS mice [25] and the cell autonomous INS-1 model of PWS (this work)  
400 were associated with distinct transcriptional responses. *In vivo*, an apparent physiological  
401 compensatory mechanism increased levels of mRNAs encoding all major pancreatic  
402 hormones, including insulin, amylin, glucagon, somatostatin, and pancreatic polypeptide,  
403 and several other secretory polypeptides [25]. In contrast, in PWS INS-1 cell lines no  
404 changes in gene expression were found for the endogenous rat *Ins1* or *Ins2* genes while  
405 there was diminished mRNA expression of a *mIns2::mCherry* transgene and those  
406 encoding two other secreted peptides (*Iapp* and *Npy*). Taken together, either translation  
407 or post-translational protein folding and/or trafficking of insulins must be dysregulated in  
408 PWS  $\beta$ -cells.

409 A further critical finding in the PWS INS-1 model is a concurrent down-regulation  
410 at the transcriptional and polypeptide levels of numerous ER chaperones, including for  
411 GRP78 and GRP94 that are major facilitators of insulin folding and trafficking in the ER.  
412 GRP94 directly binds pro-insulin, and chemical inhibition or shRNA knockdown or genetic  
413 ablation of the *Hsp90b1* gene results in diminished insulin processing and secretion,  
414 larger but immature insulin granules, and activation of the PERK ER stress pathway [65].  
415 Similarly, knockdown of *Hspa5* in INS-1(832/13) cells reduced insulin biosynthesis and  
416 secretion [66], a finding validated in human EndoC- $\beta$ H1 cells [67]. The acute reduction of

417 single ER chaperones resulting in reduced insulin production and secretion indicates a  
418 direct impact at the level of ER insulin protein folding and trafficking that is recapitulated  
419 in the PWS INS-1 model where we describe a chronic shortage of multiple ER-  
420 chaperones. Therefore, we interpret the broad ER-chaperone deficiency in the PWS INS-  
421 1 model as a primary molecular abnormality that directly results in diminished insulin  
422 secretion.

423

#### 424 **Chronic stress-independent ER chaperone deficits in PWS $\beta$ -cells prevents ER** 425 **chaperone dosage compensation**

426 Prior evidence from mouse knockout models of key ER chaperone genes has  
427 shown that they are subject to dosage compensation to maintain homeostasis. Although  
428 knockouts for either *Hspa5* (GRP78) or *Hsp90b1* (GRP94) are lethal early in mouse  
429 embryogenesis, heterozygous mice are viable [34, 68-70]. Intriguingly, upregulation of  
430 GRP94 and other ER chaperones occurs in *Hspa5* +/- mice [68] and similarly for GRP78  
431 in *Hsp90b1* -/- ES cells [69], indicative of dosage compensation among ER chaperones.  
432 A similar mechanism operates in *Hspa5* +/- mice to attenuate diet-induced obesity and  
433 insulin resistance [70]. Compensatory changes with upregulation of GRP94 or GRP78  
434 and other ER chaperones including PDIA6 also occurred with shRNA knockdown of  
435 *Hspa5* or *Hsp90b1*, respectively, in a mouse cell line [71]. In contrast, the widespread  
436 deficiency of ER chaperones, including GRP78 and GRP94, that we describe for PWS  
437 INS-1  $\beta$ -cells would preclude compensatory increases. Because of an inability to  
438 compensate, we hypothesize that PWS  $\beta$ -cells have a chronic deficit in ER chaperone  
439 production which would interfere with folding of proinsulin and/or delay ER transit of cargo

440 (e.g., hormones) along the secretory pathway. Consistent with this hypothesis, our  
441 previous *in vivo* results using a Timer fluorescent protein demonstrated an accumulation  
442 of aged insulin in islets of PWS mice [25].

443 ER chaperones also function as sensors of ER stress, a physiological quality  
444 control mechanism responding to accumulation or failure in degradation of misfolded  
445 secretory proteins [3, 59, 62, 72, 73]. ER stress responses, governed by the IRE1 $\alpha$ /XBP1,  
446 PERK/eIF2 $\alpha$ /Ddit3(CHOP), and ATF6 regulatory pathways, aim to recover ER  
447 homeostasis by upregulating ER chaperone gene expression as part of the UPR [38, 59,  
448 62]. In unstressed cells, GRP78 forms stable complexes with each of IRE1 $\alpha$ , PERK, and  
449 ATF6 in the ER lumen [59, 60], whereas ER stress releases GRP78 and induces each  
450 pathway. Due to the demand to fold high levels of insulin, a protein notoriously difficult to  
451 fold [73],  $\beta$ -cells have a basal level of ATF6 activation to maintain higher levels of GRP78  
452 than for most cell types [74]. In contrast, unresolved ER stress within  $\beta$ -cells leads to  
453 diabetes in mouse models and human [38, 75]. For example, insulin gene mutations lead  
454 to insulin misfolding with induction of ER-stress and broad upregulation of the UPR [76],  
455 a converse mechanism to the reduced ER chaperone levels we demonstrated within PWS  
456 INS-1 cells under both basal conditions and during GSIS. Indeed, lower GRP78 levels in  
457 PWS  $\beta$ -cells likely accounts for the earlier and more robust ER stress induction by  
458 thapsigargin or tunicamycin by lowering the threshold required to dissociate ER stress  
459 activators resulting in cells that are poised to a greater degree for response by all three  
460 master regulatory pathways. Although normal  $\beta$ -cells *in vivo* cycle through states of  
461 elevated and low UPR coordinate with insulin gene expression and ER protein folding  
462 load [77-79], our omics data on steady-state mRNA and protein levels of bulk PWS INS-

463 1 cells under basal unstressed or GSIS conditions suggests a stress independent defect  
464 in ER chaperone gene expression.

465

#### 466 **A putative PWS-ER chaperone gene regulatory network (GRN)**

467 The coordinate downregulation of at least ten ER chaperone genes, including  
468 *Hspa5* and *Hsp90b1*, in PWS  $\beta$ -cells, but not the whole suite of UPR genes, supports the  
469 hypothesis that a PWS-imprinted gene or genes governs a pathway that coordinately  
470 regulates ER chaperones in a unique gene regulatory network (GRN). Although many of  
471 the DEGs that encode ER chaperones in PWS INS-1  $\beta$ -cells are known ATF6 and/or  
472 XBP1 targets, numerous ATF6, IRE1 $\alpha$ /XBP1, and ATF4/CHOP (PERK pathway) target  
473 genes [80-89] are not dysregulated in PWS INS-1 lines, suggesting a novel GRN in PWS  
474  $\beta$ -cells. Candidate transcription factors (TFs) within the PWS-ER chaperone GRN are  
475 those with binding site motifs enriched in the promoters of DEGs in PWS  $\beta$ -cells,  
476 including, but not limited to the known ATF6 co-factor NFYA, which has roles in insulin  
477 secretion and glucose homeostasis [90], as well as PPARB/D also with known roles in  $\beta$ -  
478 cell mass and insulin secretion [91]. Intriguingly, a recently published study found that  
479 TFs of the nuclear receptor 4A (NR4A) family that participate in long-term memory in mice  
480 act through coordinate regulation of numerous ER chaperones [92], with a high degree  
481 of concordance with the dysregulated ER chaperones that we identified in PWS INS-1  
482 cell lines; nevertheless, NR4A pathway factors are not DEGs in PWS  $\beta$ -cells.

483 It also remains to be determined which PWS gene or genes regulates the putative  
484 PWS $\rightarrow$ TF $\rightarrow$ ER chaperone network. Neither *Mage12* nor *Ndn* have a role, as they are not  
485 expressed in INS-1 cells. The top candidate PWS genes that are highly expressed in INS-

486 1 cells are *Snrpn*, encoding the SmN spliceosomal protein [42], *Snurf*, encoding a small  
487 arginine-rich nuclear protein [18], and *Snord116*, a tandemly duplicated C/D-box snoRNA  
488 that may function as a sno-lncRNA that sequesters FOX2 and other RNA binding  
489 proteins in alternative splicing pathways [22, 93], or through direct binding and regulation  
490 of as yet undefined RNA targets. Further studies are necessary to distinguish amongst  
491 the candidate PWS genes and to identify downstream GRN steps leading to coordinated  
492 ER chaperone expression.

493

#### 494 **Evolution of PWS gene functions in secretory endocrine cells**

495 Recent work has shown hypothalamic deficiencies in *Mage12*-null mice as well as  
496 for iPSC- and dental-pulp stem cell neuronal models, specifically in secretory granule  
497 components including PCSK1, PCSK2, CPE, granins (e.g., CHGB and others), and  
498 numerous neuropeptides [23]. These studies established that MAGEL2 plays a role in  
499 hypothalamic neuroendocrine cells by regulating neuropeptide production and secretion  
500 via endosome recycling to prevent lysosomal degradation of secretory granule proteins  
501 [23], a process downstream of the ER in protein trafficking and secretory pathways. As  
502 discussed above, our study shows that a different PWS-gene (e.g., *Snrpn*, *Snurf*, and/or  
503 *Snord116*) is putatively responsible for regulating ER chaperone and hormone (e.g.,  
504 insulin) biosynthesis and secretion from pancreatic  $\beta$ -cells. In contrast to the reported  
505 reduction of prohormone convertase PC1 in PWS iPSC-derived neurons and in  
506 *Snord116*-null mice [58], no deficiency in *Pcsk1* mRNA or PC1/3 levels or in *Pcsk2* or  
507 PC2 was observed in PWS  $\beta$ -cell lines, which may reflect differences in cell type,  
508 genetics, or experimental conditions. Combined, these observations in hypothalamic

509 neuroendocrine cells and pancreatic  $\beta$ -cells indicate that at least two PWS-imprinted  
510 genes regulate related neuropeptide and peptide hormone secretory pathways,  
511 suggesting that the PWS domain may function as a “mammalian operon” or  
512 synexpression group [94, 95]. As the PWS-domain arose evolutionarily in a eutherian  
513 mammalian ancestor [96], this suggests emergence of functions acting as molecular  
514 rheostats to regulate secretory pathways in endocrine cells that control growth,  
515 metabolism, and neural pathways.

516

### 517 **PWS genes regulate glucose and hormone homeostasis: implications for** 518 **metabolic disease**

519 Maintaining glucose homeostasis relies on exquisite coordination between  
520 secretion of the opposing hormones insulin and glucagon from pancreatic  $\beta$ - and  $\alpha$ -cells,  
521 respectively, in response to changes in blood glucose, and disruption of these processes  
522 contributes to the pathogenesis of metabolic disorders, including type 2 diabetes [38, 97-  
523 100]. Although insulin and glucagon play opposite regulatory roles both in normal  
524 metabolic homeostasis and dysfunction in type 2 diabetes, PWS mice are remarkable in  
525 having low blood levels of both insulin and glucagon [16, 25]. As recent studies indicate  
526 that GRP78 interacts with glucagon in  $\alpha$ -cells [101], it will be important to further assess  
527 dysregulation of ER chaperones and glucagon secretion in PWS  $\alpha$ -cells both in cell  
528 culture and within PWS mouse models. Intriguingly, quantitative trait locus (QTL) studies  
529 in mice link genetic variation in blood insulin and glucose levels in or near to the PWS-  
530 orthologous domain [102]. Further studies are warranted to examine the role of PWS-  
531 imprinted genes in these metabolic traits in humans, and whether  $\beta$ -cell or other



532 endocrine cell deficits in ER chaperones and hormone secretion contribute to clinical  
533 phenotypes, including episodes of hypoglycemia in PWS subjects [13, 14]. As PWS  
534 genes regulate islet development,  $\beta$ - and  $\alpha$ -cell secretion [16, 25], and a GRN affecting  
535 ER chaperone and insulin secretion (this study), identifying mechanisms by which PWS-  
536 genes carry out these critical  $\beta$ -cell functions will illuminate the pathogenesis and may  
537 reveal effective treatments for not only PWS, but for common disorders with deficits in  
538 glycemic homeostasis and islet hormone secretory pathways.

## 539 MATERIALS AND METHODS

540

### 541 Cell culture

542 INS-1 lines were cultured using “RPMI 1640 media without glucose” (Life  
543 Technologies) supplemented with 10% FBS, 10 mM HEPES, 1 mM sodium pyruvate,  
544 0.05 mM 2-mercaptoethanol, 7.5 mM glucose, and antibiotics (1% Pen-Strep, 10 µg/ml  
545 each piperacillin and ciprofloxacin). Chemical treatments included 0.1 µM thapsigargin  
546 (Sigma) for either 5 hr or a 0-5 hr time-course, and 10 µg/ml tunicamycin (Sigma) for 5 hr  
547 or a 0-8 hr time-course. The INS-1 lines used for genome editing in this study were  
548 generated from parental INS-1(832/13) cells that have integrated a human *INS*-neoR  
549 transgene [33] as well as a mouse *Ins2*-C-mCherry transgene (Costa RA, et al.,  
550 manuscript in preparation).

551

### 552 Genome editing

553 Pairs of sgRNAs (**Table S6**) were designed (<http://crispr.mit.edu/>) to target sites  
554 flanking the rodent PWS-orthologous domain to delete all paternally-expressed imprinted  
555 genes (**Fig. 1A**), and cloned into the pX330 CRISPR/Cas9 vector [103] (Addgene). INS-  
556 1 parental cells were transfected using lipofectamine 3000 with pX330-vectors encoding  
557 sgRNAs targeting proximal of *Frat3* and distal (between *Snord115* and *Ube3a*) of the  
558 PWS-domain and/or the control pEGFP-N3 vector (using 3 µg or 500 ng of DNA per  
559 vector per T75 flask or 6-well plate, respectively). After 4 days culture at 30°C or 37°C,  
560 cells were harvested for DNA isolation or flow cytometry (FACS ARIAII in the Rangos  
561 Flow Cytometry Core Laboratory) with ~ 300 GFP-positive cells plated in five 96-well  
562 plates and clonally expanded to 12-well plates for DNA isolation. Clonal lines were

563 screened by deletion-PCR and positive lines further expanded for DNA, RNA, protein,  
564 and molecular cytogenetic analyses. PCR primers for deletion-PCR, inversion-PCR, and  
565 scarred- or intact-allele PCRs are in **Table S7**. For DNA sequencing (Genewiz) of deletion  
566 breakpoints and scarred or intact sgRNA sites, we Sanger sequenced PCR products  
567 directly or from pJET (Thermo Fisher) cloned PCR products. Potential CRISPR/Cas9 off-  
568 target sites were predicted *in silico* using CRISPOR (<http://crispor.tefor.net/>); top  
569 predicted off-targets were PCR amplified (**Table S7**) and directly Sanger sequenced.

570

### 571 **Molecular cytogenetics**

572 Cytogenetic studies were carried out in the University of Pittsburgh Cell Culture  
573 and Cytogenetics Facility. Briefly, cultured INS-1 cell lines were treated with 0.1 µg/ml  
574 Colcemid 1 hr, harvested, fixed, and slides processed for metaphase FISH by standard  
575 methods [104]. Fluorescent probes were prepared by labeling BAC (BACPAC Genomics)  
576 DNA using nick translation (Enzo Life Sciences, Inc.), including CH230-114P11 from the  
577 central PWS-domain (encodes U1A-*Snurf-Snrpn-Snord107-Snord64*) with Orange-dUTP  
578 and control CH230-2B12 mapping several Mb distal of the PWS domain (encodes *Cyfp1-*  
579 *Nipa2-Nipa1-Herc2*) with Green-dUTP. Probe and slide preparation, hybridization, and  
580 DAPI staining were by standard cytogenetics methods, with FISH analyses on an  
581 Olympus BX61 epifluorescence microscope (Olympus Microscopes) and image capture  
582 and analysis using the Genus software platform on the Cytovision System (Leica  
583 Microsystems) [104].

584

### 585 **Droplet digital PCR (ddPCR) genomic copy number assays**

586 For genomic copy number 5 ng of *EcoRI* digested genomic DNA was used as input  
587 with amplification of *Snord107*, PWS-IC, and *Mirh1* as targets and *Ube3a* as a reference;  
588 during clonal derivatization EvaGreen chemistry was used whereas Fam/Hex TaqMan  
589 probes were used in a final analysis. Absolute copy number of *Snord107* and Poisson  
590 confidence intervals were calculated by numerical approximation [105]. Primers and  
591 probes for copy number ddPCR are listed in **Table S7**.

592

### 593 **DNA methylation**

594 Genomic DNA was bisulfite converted using the EZ DNA methylation Gold kit  
595 (Zymo Research). Outer first round genomic PCR was performed using primers to amplify  
596 the *Snurf-Snrpn* promoter region (annealing temperature or Ta of 64°C; **Table S7**), with  
597 subsequent second round genomic PCR performed using PCR primers specific for the  
598 maternal, methylated or paternal, unmethylated alleles (Ta of 60°C; **Table S7**). HotStart  
599 Taq polymerase (Qiagen) was used for all methylation PCR.

600

### 601 **Insulin secretion assays**

602 Cells were plated at  $1.0 \times 10^6$  cells/well, then 24 hr later at ~ 80% confluency were  
603 washed with PBS containing  $Mg^{++}$  and  $Ca^{++}$  (Gibco), pre-incubated 1.0 hr in KRBH (129  
604 mM NaCl, 5 mM  $NaHCO_3$ , 4.8 mM KCl, 1.2 mM  $KH_2PO_4$ , 1.2 mM  $MgSO_4$ , 2.5 mM  $CaCl_2$ ,  
605 10 mM HEPES, 0.1% BSA) with low glucose (LG; 2.8 mM) and washed in KRBH (without  
606 glucose). Following a 30 min incubation in KRBH-LG, 1.0 ml low glucose secreted  
607 fractions were removed and centrifuged 13,000 rpm for 5 min., aliquoted and stored at -  
608 80°C. The cells were then incubated 30 min in KRBH-high glucose (HG; 22 mM), and  
609 high glucose secreted fractions similarly centrifuged and stored at -80°C. Finally, cells

610 were washed in PBS containing  $Mg^{++}$  and  $Ca^{++}$ , harvested in RIPA lysis buffer and  
611 protease inhibitor, centrifuged at 13,000 rpm for 15 min at 4°C and the supernatant  
612 (protein) stored at -80°C. Protein was determined using Pierce BCA protein assay kit  
613 (Thermo Fisher). Insulin was measured by the RIA and Biomarkers Core of the Penn  
614 Diabetes Research Center, University of Pennsylvania, using an ultrasensitive rat insulin  
615 ELISA kit (Alpco Diagnostics). ANOVA followed by the Tukey HSD post-hoc test was  
616 used to assess differences between different conditions and genotypes using Prism 8  
617 (GraphPad Software, Inc).

618

### 619 **Reverse transcription-PCR**

620 Total RNA was isolated from PWS and control INS-1 lines grown as above (7.5  
621 mM glucose) by Trizol harvest and miRNeasy (Qiagen) column purification. RNA quality  
622 was assessed by RNA TapeStation (Agilent) and quantified by broad range Qubit  
623 (Thermo Fisher) fluorometric analysis. First strand cDNA synthesis from 1 µg RNA was  
624 carried out using random hexamer primed RT by using Super Script IV (Thermo Fisher).  
625 Primers for gene specific RT-PCR amplification are in **Table S8**.

626

### 627 **RT-Droplet digital-PCR (RT-ddPCR) assays**

628 Template cDNA pools were generated from 1 µg RNA using cells grown under  
629 standard glucose conditions (as above) by using iScript (Bio-Rad) RT with first-strand  
630 synthesis priming from a mixture of random hexamers and oligo-dT. Droplet generation,  
631 PCR and reading of EvaGreen based ddPCR reactions was carried out using an  
632 automated QX200 ddPCR system (Bio-Rad). A total template input volume of 2 µl of  
633 cDNA diluted in a range from undiluted to 1:200 (30 ng to 0.15 ng RNA equivalents per

634 reaction) determined empirically based on the absolute expression level of target genes  
635 was used per 20  $\mu$ l reaction. Primer sequences are listed in **Table S8**. Expression of  
636 target genes was normalized to the stable and modestly expressed *Gpi* (1:5 diluted, 6.0  
637 ng RNA equivalents) as the ratio of positive droplet concentration and normalized to the  
638 average expression levels of target genes in the control INS-1 lines. Relative expression  
639 of target genes in PWS and control lines was compared using the Welch's t-test for  
640 unequal variance with a significant threshold of  $P < 0.05$ .

641

## 642 **Proteomics**

643 Each of the 3 control cell lines (5-9, 2, 16) and the 3 PWS cell lines (3, 19-1, 19-4)  
644 were grown in 6-well plates, harvested and then washed with PBS containing  $Mg^{++}$  and  
645  $Ca^{++}$ , incubated 30 min in KRH-high glucose (22 mM, glucose-induced insulin secretion  
646 condition, with BSA excluded from the KRBH buffer) after which the media was collected,  
647 centrifuged 10 min 1300 rpm, and supernatant (secretory fractions 1-6; **Fig. 3A**) collected  
648 and stored at  $-80^{\circ}C$ . Cellular proteins were harvested by direct addition of 1.0 ml of  
649 methanol-acetic acid (90% methanol, 9% water, 1% acetic acid) to each well, transferred  
650 to a microcentrifuge tube and centrifuged at 1300 rpm 15 min. The supernatant (soluble  
651 protein fractions 7-12; **Fig. 3A**) and pellets (insoluble protein fractions 13-18; **Fig. 3A**)  
652 were collected and stored at  $-80^{\circ}C$ . The secretory and cellular fractions were dried *in*  
653 *vacuo* and stored at  $-80^{\circ}C$ . In preparation for mass spectrometry, proteins from each  
654 fraction were dissolved in 8 M urea, 100  $\mu$ M Triethylammonium bicarbonate (TEAB) pH  
655 8.5, reduced with tris(2-carboxyethyl)phosphine (TCEP) and alkylated with  
656 chloroacetamide, then diluted to 2 M urea with 100 mM TEAB, addition of 0.5  $\mu$ g trypsin  
657 (Promega) and placed in a  $37^{\circ}C$  shaker for 16 hrs. Secretory protein fractions were

658 analyzed on an Orbitrap Elite mass spectrometer (Thermo Fisher) while cellular protein  
659 fractions were analyzed on an Orbitrap Fusion mass spectrometer (Thermo Fisher). The  
660 6-plex Tandem Mass Tag (TMT) system for quantitative proteomics (Thermo Fisher) was  
661 used to compare methanol-acetic acid insoluble cellular proteins (fractions 13-18) for  
662 control and PWS cell lines. The TMT labeled samples were analyzed on an Orbitrap  
663 Fusion Lumos mass spectrometer (Thermo Fisher).

664 Peptide/protein identification and quantification were determined using IP2  
665 (Integrated Proteomics Applications). The MS raw data files were converted using  
666 RawConverter [106] (version 1.1.0.23) with monoisotopic option. For peptide  
667 identification, tandem mass spectra were searched against a database including the  
668 UniProt Rat database one entry per gene (21589 entries released 5/30/2021), these  
669 entries scrambled between K and R to make a decoy database, common contaminants,  
670 peptides and custom proteins using ProLuCID [107], and data filtered using DTASelect  
671 [108]. Quantitation of TMT samples was calculated with Census version 2.51 [109] and  
672 filtered with an intensity value of 5000 and isobaric purity value of 0.6 [110]. The  
673 Quantitative@COMPARE feature of IP2 was used to determine statistical significance.

674

## 675 **Immunoblot analyses**

676 Cells were grown under standard glucose conditions with or without the addition  
677 of DMSO, thapsigargin or tunicamycin (as above). Whole cell lysates were harvested by  
678 direct lysis in cold radioimmunoprecipitation buffer (RIPA) with the addition of EDTA and  
679 combined protease and phosphatase inhibitors (Thermo Fisher) followed by clearing of  
680 insoluble material by centrifugation at 13,000 RPM for 10 minutes. Proteins were  
681 separated by SDS-PAGE with 2-mercaptoethanol as a reducing agent using criterion

682 sized 4-15% gradient tris-glycine for broad range of molecular weights greater than 30  
683 kDa or 16.5% tris-tricine for high resolution of smaller proteins (Bio-Rad). Proteins were  
684 transferred to nitrocellulose membranes and probed with antibodies [commercially  
685 obtained except for ATF6 [63], with dilutions as in **Table S9**]. Chemiluminescence  
686 detection of HRP-conjugated secondary antibodies was performed with either Clarity or  
687 Clarity Max Western ECL detection kits on a Bio-Rad Chemi-Doc XRS+ imager.  
688 Densitometry measurements were made using Image Lab (Bio-Rad) software and  
689 exported for analysis in R. Statistical comparison of normalized protein levels between  
690 PWS and control samples was made by either Welch's unequal variance t-test or by  
691 ANOVA with Tukey's HSD post-hoc test for multiple comparison where appropriate, with  
692 a significance threshold of  $P < 0.05$ .

693

#### 694 **Transmission electron microscopy**

695 Monolayers of INS-1 cells were fixed in 2.5% glutaraldehyde in 100 mM PBS, post-  
696 fixed in aqueous 1% osmium tetroxide, 1%  $\text{Fe}_6\text{CN}_3$  for 1 hr, and dehydrated prior to  
697 embedding in Polybed 812 resin (Polysciences). Ultrathin cross sections (60 nm) of the  
698 cells were obtained on a Riechart Ultracut E microtome, post-stained in 4% uranyl acetate  
699 for 10 min and 1% lead citrate for 7 min. Sections were viewed on a JEOL JEM 1400  
700 FLASH transmission electron microscope (JEOL) at 80 KV. Images were taken using a  
701 bottom mount AMT digital camera (Advanced Microscopy Techniques).

702

#### 703 **Confocal microscopy**

704 For each of the 3 control and 3 PWS INS-1 lines 750,000 live cells were seeded  
705 on a 35 mm dish with an uncoated 14 mm glass bottom insert (Mattek) and allowed to



706 grow for 36 hr in basal glucose conditions. Live cell imaging was performed on a Zeiss  
707 LSM 710 confocal microscope at 20x magnification to capture mCherry fluorescence and  
708 brightfield images.

709

## 710 **RNA-seq and bioinformatics**

711 Total RNA (from cells grown under 7.5 mM glucose) was used to prepare rRNA  
712 depleted Illumina TruSeq 75-bp paired-end stranded (fr-firststrand) sequencing libraries  
713 and sequenced to a depth of ~ 40 million reads on a NextSeq500 instrument at the UPMC  
714 Children's Hospital of Pittsburgh Genomics Core. RNA-seq data analysis was performed  
715 using computational resources available from the University of Pittsburgh Center for  
716 Research Computing. Quality of reads was assessed by FastQC and sequencing  
717 adapters trimmed by cutadapt using the combined TrimGalore tool [111]. The sequencing  
718 reads were aligned to the Ensembl v98 rat genome to which the sequence and annotation  
719 of the human *INS-neo*<sup>R</sup> and mouse *Ins2-C-mCherry* transgenes had been added along  
720 with annotation of previously undefined genomic features (e.g., *lpw*, *ψSnurf*, and  
721 upstream *U1 Snurf-Snrpn* exons) using the STAR splice-aware aligner [112]. Gene  
722 feature counts were tabulated with HTSeq using either the default (--nonunique none) or  
723 customized (--nonunique all) options to enable the inclusion of multi-copy (i.e., *Snord116*)  
724 and overlapping (bicistronic *Snurf-Snrpn*) genes which otherwise were excluded as  
725 ambiguous reads under the default options [113]. Differential expression analysis was  
726 performed with DESeq2 using a cutoff of  $P_{adj} < 0.1$  as calculated by the Benjamini-  
727 Hochberg multiple comparison procedure [114]. Similar overall transcriptomic results  
728 were obtained with RSEM based analysis [115] but had lower counts for both multi-  
729 mapped reads for *Snord116* and for ambiguous bicistronic *Snurf-Snrpn* reads. Gene

730 ontology enrichment analysis of up- and down-regulated gene sets was done using  
731 DAVID [116]. Additional gene ontology and upstream analysis utilized Enrichr [117].  
732 Sequencing libraries of small RNAs including snoRNAs were made from the same total  
733 RNA isolation but using a miRNA-Seq (Qiagen) library prep kit with a modified size  
734 selection for up to 200-bp fragments. Single end reads were generated and sequenced.  
735 UMI tools [118] and Cutadapt [119] were used to deduplicate and remove adapters in  
736 preprocessing of the fastq reads for alignment with Bowtie2 [120]. Similar to the total  
737 RNA-seq, HTSeq required the --nonunique all option to accurately quantitate the  
738 multicopy snoRNA and miRNA genes, and DESeq2 was used for differential expression  
739 analysis to compare genotypes. A full set of bash scripts for analysis of both total and  
740 small RNA-seq data sets including custom annotations are provided at the github  
741 repository ([https://github.com/KoppesEA/INS-1\\_PWS\\_RNA-Seq](https://github.com/KoppesEA/INS-1_PWS_RNA-Seq)).

742 **DATA STATEMENT**

743           The RNA-seq FASTQ files and processed data associated from this study have  
744 been deposited in the NCBI Gene Expression Omnibus (GEO) under SuperSeries  
745 GSE190337 including GSE190334 (total RNA-seq) and GSE190336 (small RNA-seq),  
746 assigned to BioProject PRJNA786769.

747           The TMT quantitative proteomics data files have been deposited at  
748 ProteomeXchange under accession number PXD034471.

749

750 **ACKNOWLEDGMENTS**

751           We thank Dr. Michael R. Rickels and Heather W. Collins at the Penn Diabetes  
752 Center RIA/Biomarkers Core, Mary F. Sanchirico for the protein database, Dr. Régis A.  
753 Costa for off-target PCR primer design, and Drs. Rebecca A. Simmons and Dwi  
754 Kemaladewi for review of the manuscript. This project used the University of Pittsburgh  
755 Health Sciences Sequencing Core at UPMC Children's Hospital of Pittsburgh, for RNA  
756 sequencing. This work was supported by a research grant to R.D.N. from the Foundation  
757 for Prader-Willi Research (FPWR) and funding to R.D.N. from the Storr Family  
758 Foundation through the Prader-Willi Syndrome Association (PWSA). J.J.M., J.K.D., and  
759 J.R.Y. were supported by the National Institute of General Medical Sciences (8P41  
760 GM103533). This manuscript is dedicated to PWS families and especially the Storr family  
761 for their support of our PWS research program.

762 **AUTHOR CONTRIBUTIONS**

763 EAK, MAJ, JJM, PL, DWL, DBS, JKD performed experiments and analyzed data;  
764 EAK performed bioinformatics analyses; EAK, JJM, DBS, JRY, SCW, SMG, HJP, PD,  
765 RDN designed experiments and interpreted data; RCW provided a critical reagent; EAK,  
766 RDN wrote the manuscript; all co-authors reviewed and approved manuscript drafts and  
767 final version.

768

769 **CONFLICT OF INTEREST**

770 None declared

771 **REFERENCES**

772

- 773 1. Costa RA, Ferreira IR, Cintra HA, Gomes LHF, Guida LDC. Genotype-phenotype  
774 relationships and endocrine findings in Prader-Willi syndrome. *Front Endocrinol.*  
775 2019;10:864. doi: 10.3389/fendo.2019.00864.  
776
- 777 2. Chung MS, Langouet M, Chamberlain SJ, Carmichael GG. Prader-Willi syndrome:  
778 reflections on seminal studies and future therapies. *Open Biol.* 2020;10(9):200195. doi:  
779 10.1098/rsob.200195.  
780
- 781 3. Tauber M, Hoybye C. Endocrine disorders in Prader-Willi syndrome: a model to understand  
782 and treat hypothalamic dysfunction. *Lancet Diabetes Endocrinol.* 2021;9(4):235-46. doi:  
783 10.1016/S2213-8587(21)00002-4.  
784
- 785 4. Muscogiuri G, Formoso G, Pugliese G, Ruggeri RM, Scarano E, Colao A, RESTARE. Prader-  
786 Willi syndrome: An uptodate on endocrine and metabolic complications. *Rev Endocr Metab*  
787 *Disord.* 2019;20(2):239-50. doi: 10.1007/s11154-019-09502-2.  
788
- 789 5. Tomita T, Greeley G, Jr., Watt L, Doull V, Chance R. Protein meal-stimulated pancreatic  
790 polypeptide secretion in Prader-Willi syndrome of adults. *Pancreas.* 1989;4(4):395-400. doi:  
791 10.1097/00006676-198908000-00001.  
792
- 793 6. Lee HJ, Choe YH, Lee JH, Sohn YB, Kim SJ, Park SW, et al. Delayed response of amylin  
794 levels after an oral glucose challenge in children with Prader-Willi syndrome. *Yonsei Med J.*  
795 2011;52(2):257-62. doi: 10.3349/ymj.2011.52.2.257.  
796
- 797 7. Deal CL, Tony M, Hoybye C, Allen DB, Tauber M, Christiansen JS, Growth Hormone in  
798 Prader-Willi Syndrome Clinical Care Guidelines Workshop Participants. Growth Hormone  
799 Research Society workshop summary: consensus guidelines for recombinant human growth  
800 hormone therapy in Prader-Willi syndrome. *J Clin Endocrinol Metab.* 2013;98(6):E1072-87.  
801 doi: 10.1210/jc.2012-3888.  
802
- 803 8. Fountain MD, Jr., Schaaf CP. MAGEL2 and oxytocin-implications in Prader-Willi syndrome  
804 and beyond. *Biol Psychiatry.* 2015;78(2):78-80. doi: 10.1016/j.biopsych.2015.05.006.  
805
- 806 9. Hirsch HJ, Eldar-Geva T, Bennaroch F, Pollak Y, Gross-Tsur V. Sexual dichotomy of gonadal  
807 function in Prader-Willi syndrome from early infancy through the fourth decade. *Hum*  
808 *Reprod.* 2015;30(11):2587-96. doi: 10.1093/humrep/dev213.  
809
- 810 10. Goldstone AP, Patterson M, Kalingag N, Ghatei MA, Brynes AE, Bloom SR, et al. Fasting  
811 and postprandial hyperghrelinemia in Prader-Willi syndrome is partially explained by  
812 hypoinsulinemia, and is not due to peptide YY3-36 deficiency or seen in hypothalamic obesity  
813 due to craniopharyngioma. *J Clin Endocrinol Metab.* 2005;90(5):2681-90. doi:  
814 10.1210/jc.2003-032209.  
815

- 816 11. Schuster DP, Osei K, Zipf WB. Characterization of alterations in glucose and insulin  
817 metabolism in Prader-Willi subjects. *Metabolism*. 1996;45(12):1514-20. doi: 10.1016/s0026-  
818 0495(96)90181-x.  
819
- 820 12. Paik KH, Jin DK, Lee KH, Armstrong L, Lee JE, Oh YJ, et al. Peptide YY, cholecystokinin,  
821 insulin and ghrelin response to meal did not change, but mean serum levels of insulin is  
822 reduced in children with Prader-Willi syndrome. *J Korean Med Sci*. 2007;22(3):436-41. doi:  
823 10.3346/jkms.2007.22.3.436.  
824
- 825 13. Ma Y, Wu T, Liu Y, Wang Q, Song J, Song F, et al. Nutritional and metabolic findings in  
826 patients with Prader-Willi syndrome diagnosed in early infancy. *J Pediatr Endocrinol Metab*.  
827 2012;25(11-12):1103-9. doi: 10.1515/jpem-2012-0167.  
828
- 829 14. Harrington RA, Weinstein DA, Miller JL. Hypoglycemia in Prader-Willi syndrome. *Am J*  
830 *Med Genet A*. 2014;164A(5):1127-9. doi: 10.1002/ajmg.a.36405.  
831
- 832 15. Cummings DE, Clement K, Purnell JQ, Vaisse C, Foster KE, Frayo RS, et al. Elevated plasma  
833 ghrelin levels in Prader Willi syndrome. *Nat Med*. 2002;8(7):643-4. doi: 10.1038/nm0702-  
834 643.  
835
- 836 16. Stefan M, Ji H, Simmons RA, Cummings DE, Ahima RS, Friedman MI, et al. Hormonal and  
837 metabolic defects in a Prader-Willi syndrome mouse model with neonatal failure to thrive.  
838 *Endocrinology*. 2005;146(10):4377-85. doi: 10.1210/en.2005-0371.  
839
- 840 17. Mani BK, Shankar K, Zigman JM. Ghrelin's Relationship to Blood Glucose. *Endocrinology*.  
841 2019;160(5):1247-61. doi: 10.1210/en.2019-00074.  
842
- 843 18. Gray TA, Saitoh S, Nicholls RD. An imprinted, mammalian bicistronic transcript encodes  
844 two independent proteins. *Proc Natl Acad Sci U S A*. 1999;96(10):5616-21. doi:  
845 10.1073/pnas.96.10.5616.  
846
- 847 19. Cavallé J, Buiting K, Kiefmann M, Lalande M, Brannan CI, Horsthemke B, et al.  
848 Identification of brain-specific and imprinted small nucleolar RNA genes exhibiting an  
849 unusual genomic organization. *Proc Natl Acad Sci U S A*. 2000;97(26):14311-6. doi:  
850 10.1073/pnas.250426397.  
851
- 852 20. Nicholls RD, Knepper JL. Genome organization, function, and imprinting in Prader-Willi and  
853 Angelman syndromes. *Annu Rev Genomics Hum Genet*. 2001;2:153-75. doi:  
854 10.1146/annurev.genom.2.1.153.  
855
- 856 21. Kishore S, Stamm S. The snoRNA HBII-52 regulates alternative splicing of the serotonin  
857 receptor 2C. *Science*. 2006;311(5758):230-2. doi: 10.1126/science.1118265.  
858
- 859 22. Wu H, Yin QF, Luo Z, Yao RW, Zheng CC, Zhang J, et al. Unusual processing generates  
860 SPA lncRNAs that sequester multiple RNA binding proteins. *Mol Cell*. 2016;64(3):534-48.  
861 doi: 10.1016/j.molcel.2016.10.007.

- 862 23. Chen H, Victor AK, Klein J, Tacer KF, Tai DJ, de Esch C, et al. Loss of MAGEL2 in Prader-  
863 Willi syndrome leads to decreased secretory granule and neuropeptide production. *JCI*  
864 *Insight*. 2020;5(17):e138576. doi: 10.1172/jci.insight.138576.  
865
- 866 24. Castle JC, Armour CD, Lower M, Haynor D, Biery M, Bouzek H, et al. Digital genome-wide  
867 ncRNA expression, including snoRNAs, across 11 human tissues using polyA-neutral  
868 amplification. *PLoS One*. 2010;5(7):e11779. doi: 10.1371/journal.pone.0011779.  
869
- 870 25. Stefan M, Simmons RA, Bertera S, Trucco M, Esni F, Drain P, et al. Global deficits in  
871 development, function, and gene expression in the endocrine pancreas in a deletion mouse  
872 model of Prader-Willi syndrome. *Am J Physiol Endocrinol Metab*. 2011;300(5):E909-22. doi:  
873 10.1152/ajpendo.00185.2010.  
874
- 875 26. Benner C, van der Meulen T, Caceres E, Tigyi K, Donaldson CJ, Huisling MO. The  
876 transcriptional landscape of mouse beta cells compared to human beta cells reveals notable  
877 species differences in long non-coding RNA and protein-coding gene expression. *BMC*  
878 *Genomics*. 2014;15:620. doi: 10.1186/1471-2164-15-620.  
879
- 880 27. Li J, Klughammer J, Farlik M, Penz T, Spittler A, Barbieux C, et al. Single-cell transcriptomes  
881 reveal characteristic features of human pancreatic islet cell types. *EMBO Rep*.  
882 2016;17(2):178-87. doi: 10.15252/embr.201540946.  
883
- 884 28. Segerstolpe A, Palasantza A, Eliasson P, Andersson EM, Andreasson AC, Sun X, et al.  
885 Single-cell transcriptome profiling of human pancreatic islets in health and type 2 diabetes.  
886 *Cell Metab*. 2016;24(4):593-607. doi: 10.1016/j.cmet.2016.08.020.  
887
- 888 29. Cnop M, Abdulkarim B, Bottu G, Cunha DA, Igoillo-Esteve M, Masini M, et al. RNA  
889 sequencing identifies dysregulation of the human pancreatic islet transcriptome by the  
890 saturated fatty acid palmitate. *Diabetes*. 2014;63(6):1978-93. doi: 10.2337/db13-1383.  
891
- 892 30. Eizirik DL, Sammeth M, Bouckennooghe T, Bottu G, Sisino G, Igoillo-Esteve M, et al. The  
893 human pancreatic islet transcriptome: expression of candidate genes for type 1 diabetes and  
894 the impact of pro-inflammatory cytokines. *PLoS Genet*. 2012;8(3):e1002552. doi:  
895 10.1371/journal.pgen.1002552.  
896
- 897 31. Krishnan P, Syed F, Jiyun Kang N, Mirmira RG, Evans-Molina C. Profiling of RNAs from  
898 human islet-derived exosomes in a model of type 1 diabetes. *Int J Mol Sci*. 2019;20(23):5903.  
899 doi: 10.3390/ijms20235903.  
900
- 901 32. Low BSJ, Lim CS, Ding SSL, Tan YS, Ng NHJ, Krishnan VG, et al. Decreased GLUT2 and  
902 glucose uptake contribute to insulin secretion defects in MODY3/HNF1A hiPSC-derived  
903 mutant  $\beta$  cells. *Nat Commun*. 2021;12(1):3133. doi: 10.1038/s41467-021-22843-4.  
904
- 905 33. Hohmeier HE, Mulder H, Chen G, Henkel-Rieger R, Prentki M, Newgard CB. Isolation of  
906 INS-1-derived cell lines with robust ATP-sensitive  $K^+$  channel-dependent and -independent  
907 glucose-stimulated insulin secretion. *Diabetes*. 2000;49(3):424-30. doi:  
908 10.2337/diabetes.49.3.424.

- 909 34. Zhu G, Lee AS. Role of the unfolded protein response, GRP78 and GRP94 in organ  
910 homeostasis. *J Cell Physiol.* 2015;230(7):1413-20. doi: 10.1002/jcp.24923.  
911
- 912 35. Rajpal G, Schuiki I, Liu M, Volchuk A, Arvan P. Action of protein disulfide isomerase on  
913 proinsulin exit from endoplasmic reticulum of pancreatic  $\beta$ -cells. *J Biol Chem.*  
914 2012;287(1):43-7. doi: 10.1074/jbc.C111.279927.  
915
- 916 36. Sun M, Kotler JLM, Liu S, Street TO. The endoplasmic reticulum (ER) chaperones BiP and  
917 Grp94 selectively associate when BiP is in the ADP conformation. *J Biol Chem.*  
918 2019;294(16):6387-96. doi: 10.1074/jbc.RA118.007050.  
919
- 920 37. Kalwat MA, Scheuner D, Rodrigues-Dos-Santos K, Eizirik DL, Cobb MH. The pancreatic  $\beta$ -  
921 cell response to secretory demands and adaption to stress. *Endocrinology.*  
922 2021;162(11):bqab173. doi: 10.1210/endo.cr/bqab173.  
923
- 924 38. Sharma RB, Landa-Galvan HV, Alonso LC. Living dangerously: protective and harmful ER  
925 stress responses in pancreatic  $\beta$ -cells. *Diabetes.* 2021;70(11):2431-43. doi: 10.2337/dbi20-  
926 0033.  
927
- 928 39. Yong J, Johnson JD, Arvan P, Han J, Kaufman RJ. Therapeutic opportunities for pancreatic  
929  $\beta$ -cell ER stress in diabetes mellitus. *Nat Rev Endocrinol.* 2021;17(8):455-67. doi:  
930 10.1038/s41574-021-00510-4.  
931
- 932 40. Skelin M, Rupnik M, Cencic A. Pancreatic beta cell lines and their applications in diabetes  
933 mellitus research. *ALTEX.* 2010;27(2):105-13. doi: 10.14573/altex.2010.2.105.  
934
- 935 41. Watkins S, Geng X, Li L, Papworth G, Robbins PD, Drain P. Imaging secretory vesicles by  
936 fluorescent protein insertion in propeptide rather than mature secreted peptide. *Traffic.*  
937 2002;3(7):461-71. doi: 10.1034/j.1600-0854.2002.30703.x.  
938
- 939 42. Gray TA, Smithwick MJ, Schaldach MA, Martone DL, Graves JA, McCarrey JR, et al.  
940 Concerted regulation and molecular evolution of the duplicated SNRPB'/B and SNRPN loci.  
941 *Nucleic Acids Res.* 1999;27(23):4577-84. doi: 10.1093/nar/27.23.4577.  
942
- 943 43. Liu Q, He H, Zeng T, Huang Z, Fan T, Wu Q. Neural-specific expression of miR-344-3p  
944 during mouse embryonic development. *J Mol Histol.* 2014;45(4):363-72. doi:  
945 10.1007/s10735-013-9555-y.  
946
- 947 44. Lawlor N, Marquez EJ, Orchard P, Narisu N, Shamim MS, Thibodeau A, et al. Multiomic  
948 profiling identifies cis-regulatory networks underlying human pancreatic  $\beta$  cell identity and  
949 function. *Cell Rep.* 2019;26(3):788-801. doi: 10.1016/j.celrep.2018.12.083.  
950
- 951 45. Fujimoto K, Shibasaki T, Yokoi N, Kashima Y, Matsumoto M, Sasaki T, et al. Piccolo, a  
952  $Ca^{2+}$  sensor in pancreatic beta-cells. Involvement of cAMP-GEFII.Rim2. Piccolo complex  
953 in cAMP-dependent exocytosis. *J Biol Chem.* 2002;277(52):50497-502. doi:  
954 10.1074/jbc.M210146200.



- 955 46. Obermuller S, Calegari F, King A, Lindqvist A, Lundquist I, Salehi A, et al. Defective  
956 secretion of islet hormones in chromogranin-B deficient mice. *PLoS One*. 2010;5(1):e8936.  
957 doi: 10.1371/journal.pone.0008936.  
958
- 959 47. Proverbio MC, Mangano E, Gessi A, Bordoni R, Spinelli R, Asselta R, et al. Whole genome  
960 SNP genotyping and exome sequencing reveal novel genetic variants and putative causative  
961 genes in congenital hyperinsulinism. *PLoS One*. 2013;8(7):e68740. doi:  
962 10.1371/journal.pone.0068740.  
963
- 964 48. Reinbothe TM, Alkayyali S, Ahlqvist E, Tuomi T, Isomaa B, Lyssenko V, et al. The human  
965 L-type calcium channel Cav1.3 regulates insulin release and polymorphisms in CACNA1D  
966 associate with type 2 diabetes. *Diabetologia*. 2013;56(2):340-9. doi: 10.1007/s00125-012-  
967 2758-z.  
968
- 969 49. Fan F, Matsunaga K, Wang H, Ishizaki R, Kobayashi E, Kiyonari H, et al. Exophilin-8  
970 assembles secretory granules for exocytosis in the actin cortex via interaction with RIM-BP2  
971 and myosin-VIIa. *Elife*. 2017;6:e26174. doi: 10.7554/eLife.26174.  
972
- 973 50. Matsunaga K, Taoka M, Isobe T, Izumi T. Rab2a and Rab27a cooperatively regulate the  
974 transition from granule maturation to exocytosis through the dual effector Noc2. *J Cell Sci*.  
975 2017;130(3):541-50. doi: 10.1242/jcs.195479.  
976
- 977 51. Drujont L, Lemoine A, Moreau A, Bienvenu G, Lancien M, Cens T, et al. ROR $\gamma$ t<sup>+</sup> cells  
978 selectively express redundant cation channels linked to the Golgi apparatus. *Sci Rep*.  
979 2016;6:23682. doi: 10.1038/srep23682.  
980
- 981 52. Nakajima-Nagata N, Sugai M, Sakurai T, Miyazaki J, Tabata Y, Shimizu A. Pdx-1 enables  
982 insulin secretion by regulating synaptotagmin 1 gene expression. *Biochem Biophys Res*  
983 *Commun*. 2004;318(3):631-5. doi: 10.1016/j.bbrc.2004.04.071.  
984
- 985 53. Li L, Pan ZF, Huang X, Wu BW, Li T, Kang MX, et al. Junctophilin 3 expresses in pancreatic  
986 beta cells and is required for glucose-stimulated insulin secretion. *Cell Death Dis*.  
987 2016;7(6):e2275. doi: 10.1038/cddis.2016.179.  
988
- 989 54. Oda Y, Okada T, Yoshida H, Kaufman RJ, Nagata K, Mori K. Derlin-2 and Derlin-3 are  
990 regulated by the mammalian unfolded protein response and are required for ER-associated  
991 degradation. *J Cell Biol*. 2006;172(3):383-93. doi: 10.1083/jcb.200507057.  
992
- 993 55. van Loon NM, Lindholm D, Zelcer N. The E3 ubiquitin ligase inducible degrader of the LDL  
994 receptor/myosin light chain interacting protein in health and disease. *Curr Opin Lipidol*.  
995 2019;30(3):192-7. doi: 10.1097/MOL.0000000000000593.  
996
- 997 56. Naito T, Takatsu H, Miyano R, Takada N, Nakayama K, Shin HW. Phospholipid flippase  
998 ATP10A translocates phosphatidylcholine and is involved in plasma membrane dynamics. *J*  
999 *Biol Chem*. 2015;290(24):15004-17. doi: 10.1074/jbc.M115.655191.

1000

- 1001 57. Kronenberg-Versteeg D, Eichmann M, Russell MA, de Ru A, Hehn B, Yusuf N, et al.  
1002 Molecular pathways for immune recognition of preproinsulin signal peptide in type 1  
1003 diabetes. *Diabetes*. 2018;67(4):687-96. doi: 10.2337/db17-0021.  
1004
- 1005 58. Burnett LC, LeDuc CA, Sulsona CR, Paull D, Rausch R, Eddiry S, et al. Deficiency in  
1006 prohormone convertase PC1 impairs prohormone processing in Prader-Willi syndrome. *J Clin*  
1007 *Invest*. 2017;127(1):293-305. doi: 10.1172/JCI88648.  
1008
- 1009 59. Bertolotti A, Zhang Y, Hendershot LM, Harding HP, Ron D. Dynamic interaction of BiP and  
1010 ER stress transducers in the unfolded-protein response. *Nat Cell Biol*. 2000;2(6):326-32. doi:  
1011 10.1038/35014014.  
1012
- 1013 60. Shen J, Chen X, Hendershot L, Prywes R. ER stress regulation of ATF6 localization by  
1014 dissociation of BiP/GRP78 binding and unmasking of Golgi localization signals. *Dev Cell*.  
1015 2002;3(1):99-111. doi: 10.1016/s1534-5807(02)00203-4.  
1016
- 1017 61. Hong M, Luo S, Baumeister P, Huang JM, Gogia RK, Li M, et al. Underglycosylation of  
1018 ATF6 as a novel sensing mechanism for activation of the unfolded protein response. *J Biol*  
1019 *Chem*. 2004;279(12):11354-63. doi: 10.1074/jbc.M309804200.  
1020
- 1021 62. Braakman I, Bulleid NJ. Protein folding and modification in the mammalian endoplasmic  
1022 reticulum. *Annu Rev Biochem*. 2011;80:71-99. doi: 10.1146/annurev-biochem-062209-  
1023 093836.  
1024
- 1025 63. Teske BF, Wek SA, Bunpo P, Cundiff JK, McClintick JN, Anthony TG, et al. The eIF2 kinase  
1026 PERK and the integrated stress response facilitate activation of ATF6 during endoplasmic  
1027 reticulum stress. *Mol Biol Cell*. 2011;22(22):4390-405. doi: 10.1091/mbc.E11-06-0510.  
1028
- 1029 64. Tsuchiya Y, Saito M, Kadokura H, Miyazaki JI, Tashiro F, Imagawa Y, et al. IRE1-XBP1  
1030 pathway regulates oxidative proinsulin folding in pancreatic  $\beta$  cells. *J Cell Biol*.  
1031 2018;217(4):1287-301. doi: 10.1083/jcb.201707143.  
1032
- 1033 65. Ghiasi SM, Dahlby T, Hede Andersen C, Haataja L, Petersen S, Omar-Hmeadi M, et al.  
1034 Endoplasmic reticulum chaperone glucose-regulated protein 94 is essential for proinsulin  
1035 handling. *Diabetes*. 2019;68(4):747-60. doi: 10.2337/db18-0671.  
1036
- 1037 66. Zhang L, Lai E, Teodoro T, Volchuk A. GRP78, but not protein-disulfide isomerase, partially  
1038 reverses hyperglycemia-induced inhibition of insulin synthesis and secretion in pancreatic  $\beta$ -  
1039 Cells. *J Biol Chem*. 2009;284(8):5289-98. doi: 10.1074/jbc.M805477200.  
1040
- 1041 67. Szczerbinska I, Tessitore A, Hansson LK, Agrawal A, Ragel Lopez A, Helenius M, et al.  
1042 Large-scale functional genomics screen to identify modulators of human  $\beta$ -cell insulin  
1043 secretion. *Biomedicines*. 2022;10(1). doi: 10.3390/biomedicines10010103.  
1044
- 1045 68. Luo S, Mao C, Lee B, Lee AS. GRP78/BiP is required for cell proliferation and protecting  
1046 the inner cell mass from apoptosis during early mouse embryonic development. *Mol Cell*  
1047 *Biol*. 2006;26(15):5688-97. doi: 10.1128/MCB.00779-06.

- 1048 69. Mao C, Wang M, Luo B, Wey S, Dong D, Wesselschmidt R, et al. Targeted mutation of the  
1049 mouse Grp94 gene disrupts development and perturbs endoplasmic reticulum stress signaling.  
1050 PLoS One. 2010;5(5):e10852. doi: 10.1371/journal.pone.0010852.  
1051
- 1052 70. Ye R, Jung DY, Jun JY, Li J, Luo S, Ko HJ, et al. Grp78 heterozygosity promotes adaptive  
1053 unfolded protein response and attenuates diet-induced obesity and insulin resistance.  
1054 Diabetes. 2010;59(1):6-16. doi: 10.2337/db09-0755.  
1055
- 1056 71. Eletto D, Maganty A, Eletto D, Dersh D, Makarewich C, Biswas C, et al. Limitation of  
1057 individual folding resources in the ER leads to outcomes distinct from the unfolded protein  
1058 response. J Cell Sci. 2012;125(Pt 20):4865-75. doi: 10.1242/jcs.108928.  
1059
- 1060 72. Tiwari A, Schuiki I, Zhang L, Allister EM, Wheeler MB, Volchuk A. SDF2L1 interacts with  
1061 the ER-associated degradation machinery and retards the degradation of mutant proinsulin in  
1062 pancreatic  $\beta$ -cells. J Cell Sci. 2013;126(Pt 9):1962-8. doi: 10.1242/jcs.117374.  
1063
- 1064 73. Sun J, Cui J, He Q, Chen Z, Arvan P, Liu M. Proinsulin misfolding and endoplasmic reticulum  
1065 stress during the development and progression of diabetes. Mol Aspects Med. 2015;42:105-  
1066 18. doi: 10.1016/j.mam.2015.01.001.  
1067
- 1068 74. Teodoro T, Odisho T, Sidorova E, Volchuk A. Pancreatic  $\beta$ -cells depend on basal expression  
1069 of active ATF6 $\alpha$ -p50 for cell survival even under nonstress conditions. Am J Physiol Cell  
1070 Physiol. 2012;302(7):C992-1003. doi: 10.1152/ajpcell.00160.2011.  
1071
- 1072 75. Salpea P, Cosentino C, Igoillo-Esteve M. A Review of Mouse Models of Monogenic Diabetes  
1073 and ER Stress Signaling. Methods Mol Biol. 2020;2128:55-67. doi: 10.1007/978-1-0716-  
1074 0385-7\_4.  
1075
- 1076 76. Hartley T, Siva M, Lai E, Teodoro T, Zhang L, Volchuk A. Endoplasmic reticulum stress  
1077 response in an INS-1 pancreatic beta-cell line with inducible expression of a folding-deficient  
1078 proinsulin. BMC Cell Biol. 2010;11:59. doi: 10.1186/1471-2121-11-59.  
1079
- 1080 77. Preissler S, Ron D. Early events in the endoplasmic reticulum unfolded protein response. Cold  
1081 Spring Harb Perspect Biol. 2019;11(4):a033894. doi: 10.1101/cshperspect.a033894.  
1082
- 1083 78. Sharma RB, O'Donnell AC, Stamateris RE, Ha B, McCloskey KM, Reynolds PR, et al. Insulin  
1084 demand regulates  $\beta$  cell number via the unfolded protein response. J Clin Invest.  
1085 2015;125(10):3831-46. doi: 10.1172/JCI79264.  
1086
- 1087 79. Xin Y, Dominguez Gutierrez G, Okamoto H, Kim J, Lee AH, Adler C, et al. Pseudotime  
1088 Ordering of single human  $\beta$ -cells reveals states of insulin production and unfolded protein  
1089 response. Diabetes. 2018;67(9):1783-94. doi: 10.2337/db18-0365.  
1090
- 1091 80. Adachi Y, Yamamoto K, Okada T, Yoshida H, Harada A, Mori K. ATF6 is a transcription  
1092 factor specializing in the regulation of quality control proteins in the endoplasmic reticulum.  
1093 Cell Struct Funct. 2008;33(1):75-89. doi: 10.1247/csf.07044.

- 1094 81. Hassler JR, Scheuner DL, Wang S, Han J, Kodali VK, Li P, et al. The IRE1alpha/XBP1s  
1095 pathway is essential for the glucose response and protection of  $\beta$  cells. *PLoS Biol.*  
1096 2015;13(10):e1002277. doi: 10.1371/journal.pbio.1002277.  
1097
- 1098 82. Belmont PJ, Tadimalla A, Chen WJ, Martindale JJ, Thuerauf DJ, Marcinko M, et al.  
1099 Coordination of growth and endoplasmic reticulum stress signaling by regulator of calcineurin  
1100 1 (RCAN1), a novel ATF6-inducible gene. *J Biol Chem.* 2008;283(20):14012-21. doi:  
1101 10.1074/jbc.M709776200.  
1102
- 1103 83. Sharma RB, Darko C, Alonso LC. Intersection of the ATF6 and XBP1 ER stress pathways in  
1104 mouse islet cells. *J Biol Chem.* 2020;295(41):14164-77. doi: 10.1074/jbc.RA120.014173.  
1105
- 1106 84. Acosta-Alvear D, Zhou Y, Blais A, Tsikitis M, Lents NH, Arias C, et al. XBP1 controls  
1107 diverse cell type- and condition-specific transcriptional regulatory networks. *Mol Cell.*  
1108 2007;27(1):53-66. doi: 10.1016/j.molcel.2007.06.011.  
1109
- 1110 85. Adamson B, Norman TM, Jost M, Cho MY, Nunez JK, Chen Y, et al. A multiplexed single-  
1111 cell CRISPR screening platform enables systematic dissection of the unfolded protein  
1112 response. *Cell.* 2016;167(7):1867-82 e21. doi: 10.1016/j.cell.2016.11.048.  
1113
- 1114 86. Plate L, Cooley CB, Chen JJ, Paxman RJ, Gallagher CM, Madoux F, et al. Small molecule  
1115 proteostasis regulators that reprogram the ER to reduce extracellular protein aggregation.  
1116 *Elife.* 2016;5::e15550. doi: 10.7554/eLife.15550.  
1117
- 1118 87. Bergmann TJ, Fregno I, Fumagalli F, Rinaldi A, Bertoni F, Boersema PJ, et al. Chemical  
1119 stresses fail to mimic the unfolded protein response resulting from luminal load with unfolded  
1120 polypeptides. *J Biol Chem.* 2018;293(15):5600-12. doi: 10.1074/jbc.RA117.001484.  
1121
- 1122 88. Park SM, Kang TI, So JS. Roles of XBP1s in transcriptional regulation of target genes.  
1123 *Biomedicines.* 2021;9(7):791. doi: 10.3390/biomedicines9070791.  
1124
- 1125 89. Wiseman RL, Mesgarzadeh JS, Hendershot LM. Reshaping endoplasmic reticulum quality  
1126 control through the unfolded protein response. *Mol Cell.* 2022;82(8):1477-91. doi:  
1127 10.1016/j.molcel.2022.03.025.  
1128
- 1129 90. Liu Y, He S, Zhou R, Zhang X, Yang S, Deng D, et al. Nuclear factor-Y in mouse pancreatic  
1130  $\beta$ -cells plays a crucial role in glucose homeostasis by regulating  $\beta$ -cell mass and insulin  
1131 secretion. *Diabetes.* 2021;70(8):1703-16. doi: 10.2337/db20-1238.  
1132
- 1133 91. Iglesias J, Barg S, Vallois D, Lahiri S, Roger C, Yessoufou A, et al. PPAR $\beta/\delta$  affects  
1134 pancreatic  $\beta$  cell mass and insulin secretion in mice. *J Clin Invest.* 2012;122(11):4105-17. doi:  
1135 10.1172/JCI42127.  
1136
- 1137 92. Chatterjee S, Bahl E, Mukherjee U, Walsh EN, Shetty MS, Yan AL, et al. Endoplasmic  
1138 reticulum chaperone genes encode effectors of long-term memory. *Sci Adv.*  
1139 2022;8(12):eabm6063. doi: 10.1126/sciadv.abm6063.

- 1140 93. Yin QF, Yang L, Zhang Y, Xiang JF, Wu YW, Carmichael GG, et al. Long noncoding RNAs  
1141 with snoRNA ends. *Mol Cell*. 2012;48(2):219-30. doi: 10.1016/j.molcel.2012.07.033.  
1142
- 1143 94. Niehrs C, Pollet N. Synexpression groups in eukaryotes. *Nature*. 1999;402(6761):483-7. doi:  
1144 10.1038/990025.  
1145
- 1146 95. Nicholls RD. Incriminating gene suspects, Prader-Willi style. *Nat Genet*. 1999;23(2):132-4.  
1147 doi: 10.1038/13758.  
1148
- 1149 96. Rapkins RW, Hore T, Smithwick M, Ager E, Pask AJ, Renfree MB, et al. Recent assembly  
1150 of an imprinted domain from non-imprinted components. *PLoS Genet*. 2006;2(10):e182. doi:  
1151 10.1371/journal.pgen.0020182.  
1152
- 1153 97. Rorsman P, Braun M. Regulation of insulin secretion in human pancreatic islets. *Annu Rev*  
1154 *Physiol*. 2013;75:155-79. doi: 10.1146/annurev-physiol-030212-183754.  
1155
- 1156 98. Sandoval DA, D'Alessio DA. Physiology of proglucagon peptides: role of glucagon and GLP-  
1157 1 in health and disease. *Physiol Rev*. 2015;95(2):513-48. doi: 10.1152/physrev.00013.2014.  
1158
- 1159 99. Roder PV, Wu B, Liu Y, Han W. Pancreatic regulation of glucose homeostasis. *Exp Mol Med*.  
1160 2016;48:e219. doi: 10.1038/emm.2016.6.  
1161
- 1162 100. Chen YC, Taylor AJ, Verchere CB. Islet prohormone processing in health and disease.  
1163 *Diabetes Obes Metab*. 2018;20 Suppl 2:64-76. doi: 10.1111/dom.13401.  
1164
- 1165 101. Asadi F, Dhanvantari S. Plasticity in the glucagon interactome reveals novel proteins that  
1166 regulate glucagon secretion in  $\alpha$ -TC1-6 cells. *Front Endocrinol*. 2018;9:792. doi:  
1167 10.3389/fendo.2018.00792.  
1168
- 1169 102. Lawson HA, Lee A, Fawcett GL, Wang B, Pletscher LS, Maxwell TJ, et al. The importance  
1170 of context to the genetic architecture of diabetes-related traits is revealed in a genome-wide  
1171 scan of a LG/J x SM/J murine model. *Mamm Genome*. 2011;22(3-4):197-208. doi:  
1172 10.1007/s00335-010-9313-3.  
1173
- 1174 103. Ran FA, Hsu PD, Wright J, Agarwala V, Scott DA, Zhang F. Genome engineering using the  
1175 CRISPR-Cas9 system. *Nat Protoc*. 2013;8(11):2281-308. doi: 10.1038/nprot.2013.143.  
1176
- 1177 104. Parikh RA, Appleman LJ, Bauman JE, Sankunny M, Lewis DW, Vlad A, et al. Upregulation  
1178 of the ATR-CHEK1 pathway in oral squamous cell carcinomas. *Genes Chromosomes Cancer*.  
1179 2014;53(1):25-37. doi: 10.1002/gcc.22115.  
1180
- 1181 105. Dube S, Qin J, Ramakrishnan R. Mathematical analysis of copy number variation in a DNA  
1182 sample using digital PCR on a nanofluidic device. *PLoS One*. 2008;3(8):e2876. doi:  
1183 10.1371/journal.pone.0002876.  
1184

- 1185 106. He L, Diedrich J, Chu YY, Yates JR, 3rd. Extracting accurate precursor information for  
1186 tandem mass spectra by RawConverter. *Anal Chem.* 2015;87(22):11361-7. doi:  
1187 10.1021/acs.analchem.5b02721.  
1188
- 1189 107. Xu T, Park SK, Venable JD, Wohlschlegel JA, Diedrich JK, Cociorva D, et al. ProLuCID:  
1190 An improved SEQUEST-like algorithm with enhanced sensitivity and specificity. *J*  
1191 *Proteomics.* 2015;129:16-24. doi: 10.1016/j.jprot.2015.07.001.  
1192
- 1193 108. Tabb DL, McDonald WH, Yates JR, 3rd. DTASelect and Contrast: tools for assembling and  
1194 comparing protein identifications from shotgun proteomics. *J Proteome Res.* 2002;1(1):21-6.  
1195 doi: 10.1021/pr015504q.  
1196
- 1197 109. Park SK, Aslanian A, McClatchy DB, Han X, Shah H, Singh M, et al. Census 2: isobaric  
1198 labeling data analysis. *Bioinformatics.* 2014;30(15):2208-9. doi:  
1199 10.1093/bioinformatics/btu151.  
1200
- 1201 110. Sandberg A, Branca RM, Lehtio J, Forshed J. Quantitative accuracy in mass spectrometry  
1202 based proteomics of complex samples: the impact of labeling and precursor interference. *J*  
1203 *Proteomics.* 2014;96:133-44. doi: 10.1016/j.jprot.2013.10.035.  
1204
- 1205 111. Krueger F. Trim galore: A wrapper tool around Cutadapt and FastQC to consistently apply  
1206 quality and adapter trimming to fastq files 2015 [cited 2020 March 20]. Available from:  
1207 [http://www.bioinformatics.babraham.ac.uk/projects/trim\\_galore/](http://www.bioinformatics.babraham.ac.uk/projects/trim_galore/).  
1208
- 1209 112. Dobin A, Davis CA, Schlesinger F, Drenkow J, Zaleski C, Jha S, et al. STAR: ultrafast  
1210 universal RNA-seq aligner. *Bioinformatics.* 2013;29(1):15-21. doi:  
1211 10.1093/bioinformatics/bts635.  
1212
- 1213 113. Anders S, Pyl PT, Huber W. HTSeq--a Python framework to work with high-throughput  
1214 sequencing data. *Bioinformatics.* 2015;31(2):166-9. doi: 10.1093/bioinformatics/btu638.  
1215
- 1216 114. Love MI, Huber W, Anders S. Moderated estimation of fold change and dispersion for RNA-  
1217 seq data with DESeq2. *Genome Biol.* 2014;15(12):550. doi: 10.1186/s13059-014-0550-8.  
1218
- 1219 115. Li B, Dewey CN. RSEM: accurate transcript quantification from RNA-Seq data with or  
1220 without a reference genome. *BMC Bioinformatics.* 2011;12:323. doi: 10.1186/1471-2105-12-  
1221 323.  
1222
- 1223 116. Dennis G, Jr., Sherman BT, Hosack DA, Yang J, Gao W, Lane HC, et al. DAVID: Database  
1224 for Annotation, Visualization, and Integrated Discovery. *Genome Biol.* 2003;4(5):P3.  
1225
- 1226 117. Chen EY, Tan CM, Kou Y, Duan Q, Wang Z, Meirelles GV, et al. Enrichr: interactive and  
1227 collaborative HTML5 gene list enrichment analysis tool. *BMC Bioinformatics.* 2013;14:128.  
1228 doi: 10.1186/1471-2105-14-128.  
1229

- 1230 118. Smith T, Heger A, Sudbery I. UMI-tools: modeling sequencing errors in Unique Molecular  
1231 Identifiers to improve quantification accuracy. *Genome Res.* 2017;27(3):491-9. doi:  
1232 10.1101/gr.209601.116.
- 1233 119. Martin M. Cutadapt removes adapter sequences from high-throughput sequencing reads.  
1234 *EMBnetjournal.* 2011;17(1):3. doi: 10.14806/ej.17.1.200.  
1235
- 1236 120. Langmead B, Salzberg SL. Fast gapped-read alignment with Bowtie 2. *Nat Methods.*  
1237 2012;9(4):357-9. doi: 10.1038/nmeth.1923.  
1238

1239 **FIGURES and FIGURE LEGENDS**

1240 **Figure 1:**

1241

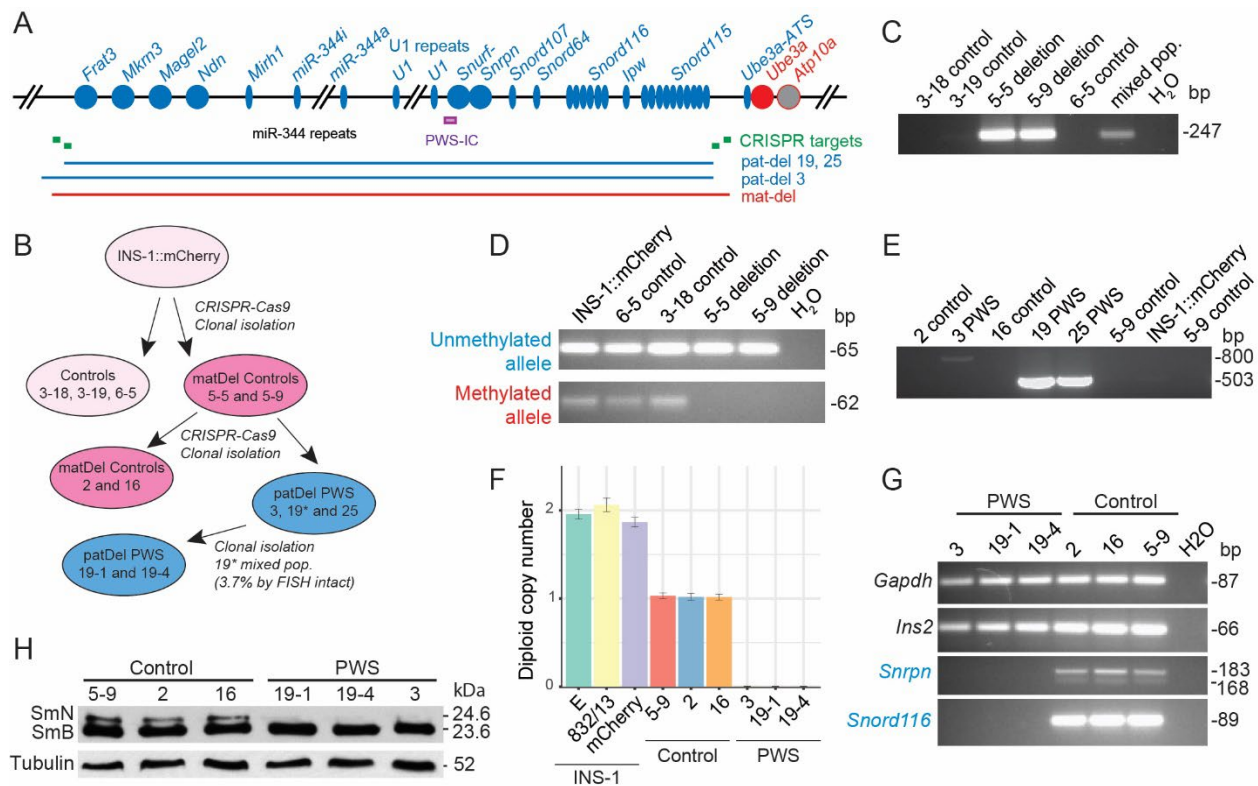

1242

1243

1244 **Figure 1. CRISPR/Cas9 genome editing to generate INS-1 lines with 3.16 Mb**

1245 **deletions of the silent (maternal) and active (paternal) PWS-imprinted domain. (A)**

1246 **Gene map of the rat PWS-imprinted domain and CRISPR/Cas9-targeted deletions.**

1247 **Symbols: circles, protein-coding genes; thin ovals, RNA genes; blue, (paternal; pat) and**

1248 **red (maternal; mat), imprinted genes; IC, imprinting control region (purple bar); green**

1249 **boxes, CRISPR gRNA target sites; blue and red horizontal bars, extent of deletions. Not**

1250 **all copies of tandemly repeated loci (*miR-344*; *U1*, *Snord116*, *Snord115*) are shown. (B)**

1251 **Schematic showing generation of genome edited, clonal INS-1 lines with 3.16 Mb**

1252 **deletions on the silent maternal allele only (5-9, 2, 16; dark pink) or homozygous deletion**

1253 **of both maternal and active paternal alleles (3, 19-1, 19-4, 25; blue). (C) First round**

1254 **deletion-PCR on genomic DNA identifies two INS-1 lines with deletions (5-9, 5-5). (D)**

1255 **DNA methylation analysis of bisulfite-modified genomic DNA at the PWS-IC establishes**

1256 **that lines 5-5 and 5-9 have deletions on the maternal allele. (E) Second round**

1257 **deletion-PCR identifies three INS-1 lines (3, 19, 25) with deletions on the paternal allele, with line**

1258 **3 having an alternate proximal breakpoint. (F) Gene dosage of *Snord107* normalized to**

1259 ***Ube3a* as determined by ddPCR using genomic DNA from the INS-1 panel of cell lines**

1260 **(also see Fig. S9). (G) PWS-deletion lines (3, 19-1, 19-4) lack mRNA expression of the**

1261 **PWS-imprinted genes, *Snrpn* and *Snord116*, as detected by RT-PCR, whereas control**

1262 **lines (5-9, 2, 16) express PWS-imprinted genes. All cell lines express the control genes**

1263 **(*Gapdh*, *Ins2*). The full panel of PWS-imprinted genes is shown in Fig. S10A,B. (H) Use**

1264 **of whole cell extracts for a western blot shows that PWS-deletion lines (3, 19-1, 19-4) lack**



1265 expression of the spliceosomal SmN polypeptide (24.6 kDa) encoded by *Snrpn*, but retain  
1266 expression of the paralogous SmB polypeptide (23.6 kDa) encoded by the unlinked *Snrpb*  
1267 gene. The control is  $\alpha$ -Tubulin.

1268 **Figure 2:**

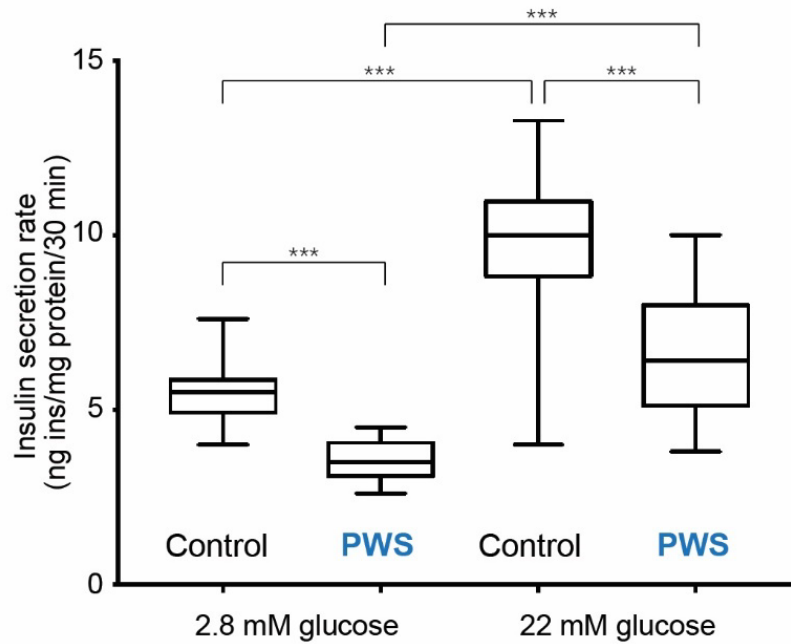

1269  
1270

1271 **Figure 2. Deficient basal and GSIS in PWS-deletion INS-1 lines.** PWS INS-1 cell lines  
1272 have insulin secretion deficits at both low (2.8 mM) and high (22 mM) glucose, based on  
1273 the pooled insulin secretory rates for each of PWS (3, 19-1, 19-4) and control (5-9, 2, 16)  
1274 groups (n=36 biological replicates per group, with n=12 per cell line). Although GSIS  
1275 increased 1.75-fold for control and 1.85-fold for PWS, loss of the PWS genes decreased  
1276 the secretory rate by 36% in basal 2.8 mM glucose conditions and by 32% in stimulatory  
1277 22 mM glucose conditions. Statistical comparison by ANOVA with Tukey post hoc test  
1278 (\*\*\*,  $P < 0.0001$ ).

1279 **Figure 3:**

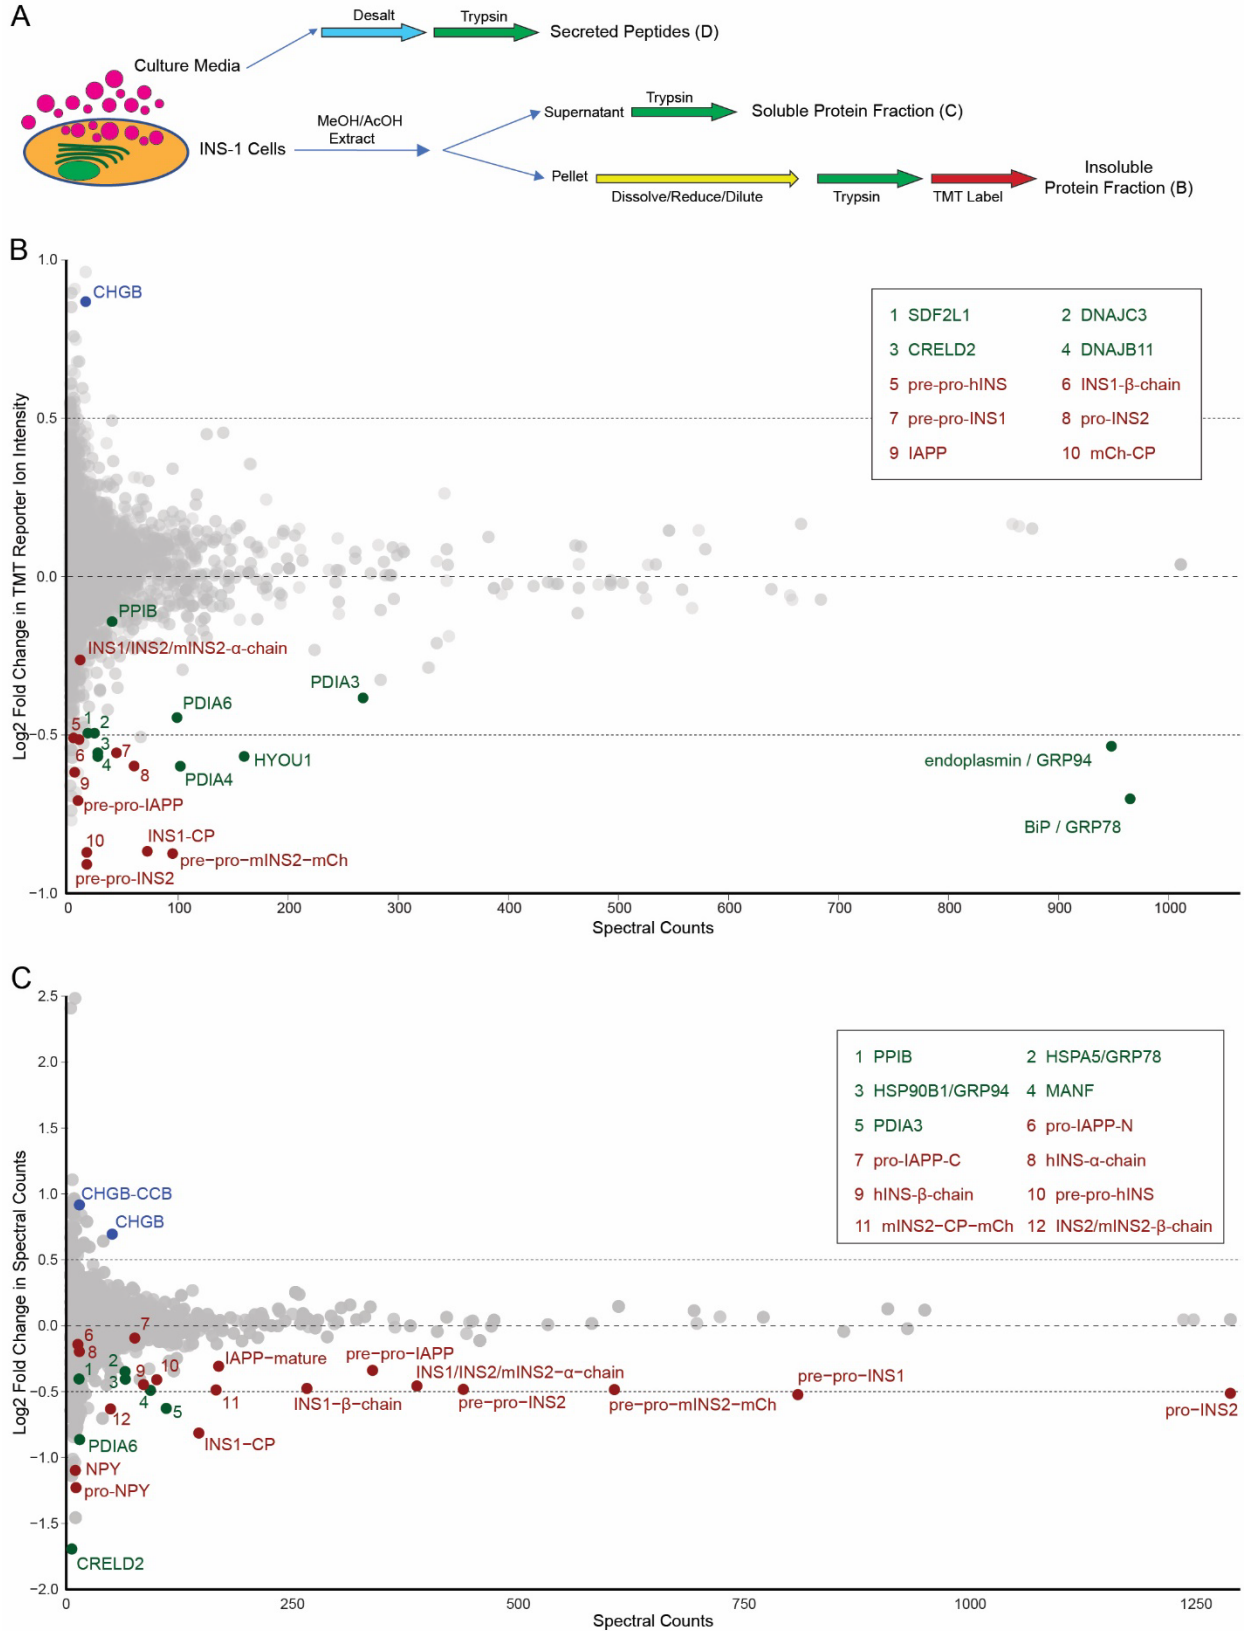

1280

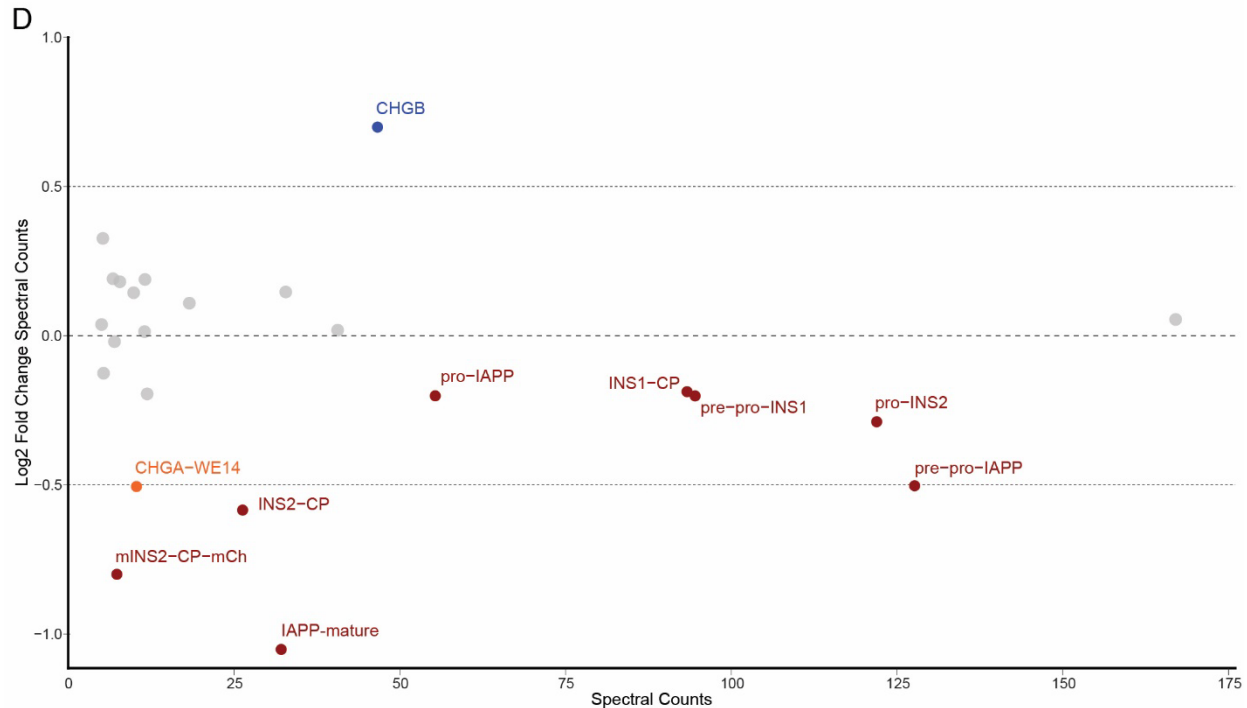

1281

1282 **Figure 3. Proteome-wide alterations in PWS-deletion vs. control INS-1 lines**  
1283 **identifies reductions in levels of ER chaperones and hormones. (A)** Multiple fractions  
1284 of PWS and control INS-1 cell cultures grown under GSIS conditions were assessed by  
1285 mass spectrometry (MS). These included peptide hormones released from secretory  
1286 granules (pink circles) into the media [see Fig. 3D] and cellular proteins methanol-acetic  
1287 acid extracted into soluble proteins [see Fig. 3C], or an insoluble protein fraction  
1288 assessed by quantitative Tandem Mass Tag (TMT) MS [see Fig. 3B]. (B-D) Relative  
1289 protein detection of proteins in PWS of Log2 Fold Change (PWS/Control) of protein  
1290 detection plotted against spectral counts indicating overall protein abundance. (B)  
1291 Relative comparison of insoluble cellular proteins in PWS and control INS-1  $\beta$ -cell lines  
1292 detected by quantitative TMT MS. Protein levels of eleven ER chaperones (green) as well  
1293 as secreted hormones (red) insulin [various processed forms of INS1, INS2, mouse (m)  
1294 mINS2-mCherry (mCh), human (h) INS, and C-peptide (CP); mature INS is the 21 amino  
1295 acid peptide identical between rat INS1, rat INS2 and mouse INS2] and amylin (full length  
1296 and processed IAPP) were markedly reduced in PWS INS-1 cell lines. In contrast,  
1297 chromogranin B (CHGB) levels are noticeably increased in PWS INS-1 cell lines (blue).  
1298 The boxed Key indicates the identity of the 10 numbered peptide spots. (C) Comparison  
1299 of soluble cellular peptides detected in PWS vs. control INS-1 lines, with reductions  
1300 observed in PWS lines for highly expressed peptide hormones (red) including insulins  
1301 [various processed forms of INS1, INS2, mINS2-mCh and CP], amylin (processed and  
1302 unprocessed IAPP), and neuropeptide Y (processed and unprocessed NPY), as well as  
1303 lower levels in the soluble fraction of the ER chaperones (green). Additionally, two  
1304 isoforms of chromogranin B (full-length CHGB and the CCB C-terminal fragment of  
1305 chromogranin B) are increased in PWS INS-1 cell lines (blue). The boxed Key indicates  
1306 the identity of the 12 numbered peptide spots. (D) Comparison of secreted peptides  
1307 highlighting reduced levels for PWS relative to control INS-1 lines for numerous secreted  
1308 hormones (red) including insulins [various processed forms of INS1, INS2, mINS2-mCh

1309 and CP] and amylin (processed and unprocessed IAPP), as well as reduced secreted  
1310 levels from PWS INS-1 lines of the CHGA-derived WE14 peptide (orange), while secreted  
1311 levels of CHGB (blue) were increased in PWS INS-1 cell lines.

1312 **Figure 4:**

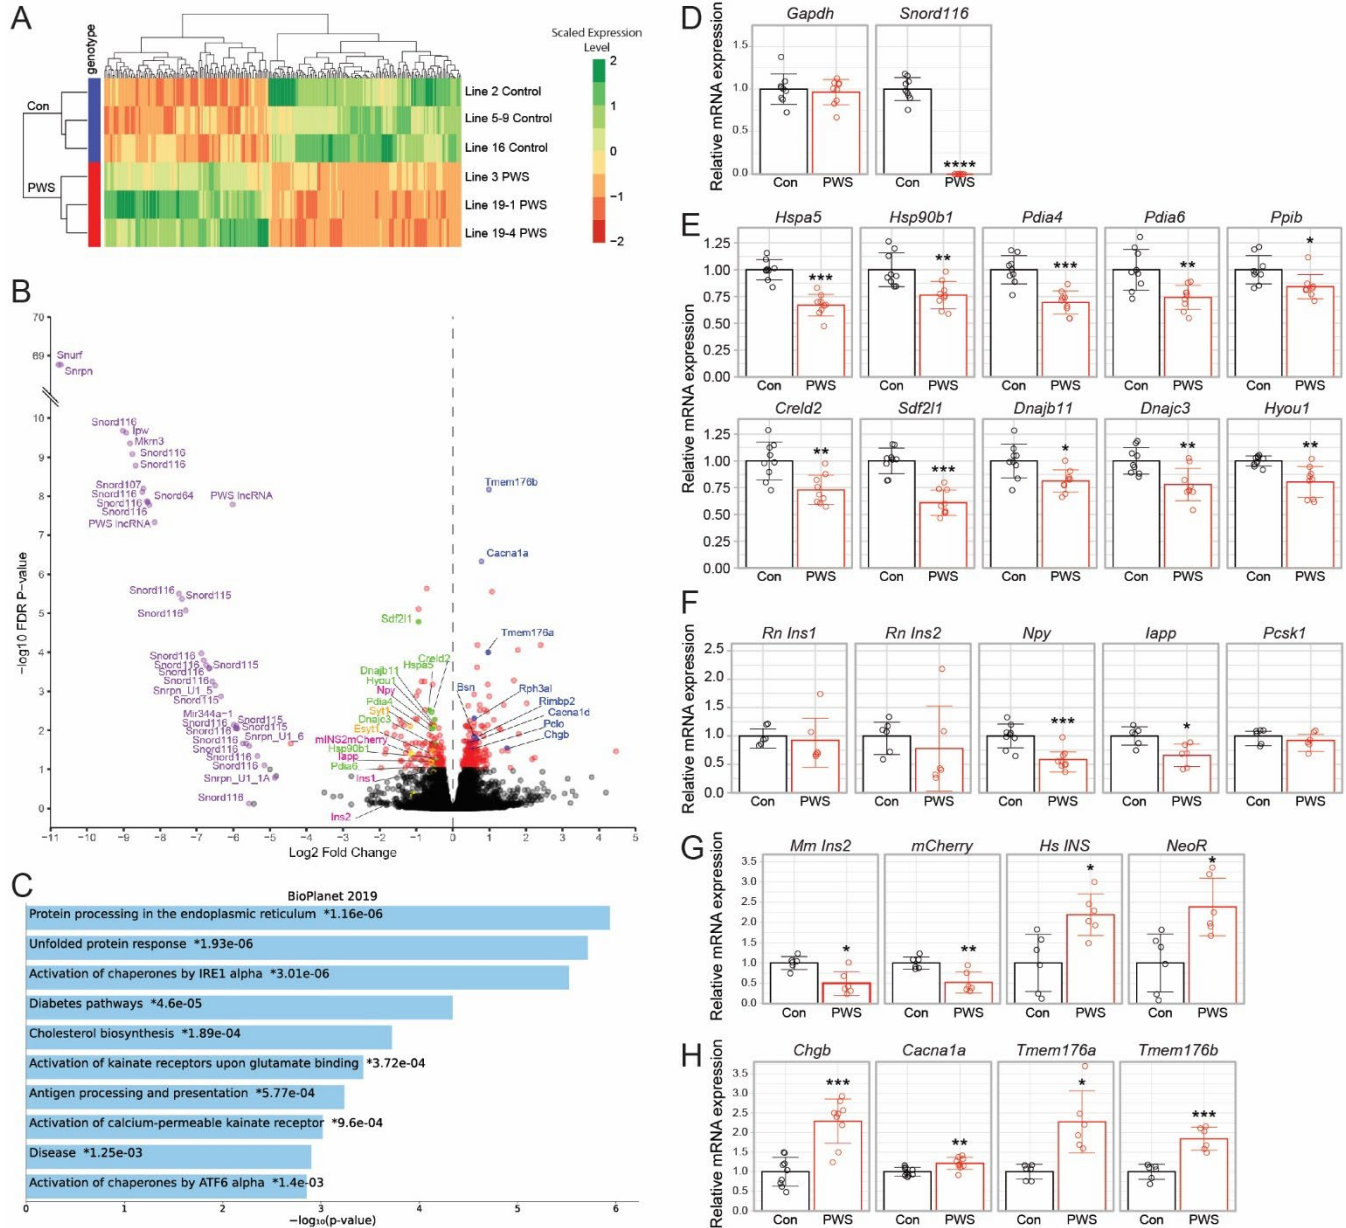

1313

1314 **Figure 4. Genome-wide transcriptome alterations in PWS-deletion vs. control INS-**  
 1315 **1 lines identifies significant differentially expressed genes (DEGs) including those**  
 1316 **encoding ER chaperones and hormones. (A)** Heatmap clustergram of 228 DEGs  
 1317 demonstrates tight clustering of PWS vs. control groups ( $P_{adj} < 0.05$ ). Scale: green  
 1318 (enriched) to red (depleted). RNA-seq was performed for 3 PWS (3, 19-1, 19-4) vs. 3  
 1319 control (5-9, 2, 16) INS-1 cell lines. **(B)** Volcano plot showing statistical significance ( $-\log_{10}$   
 1320 FDR  $P$ -value) vs. magnitude of change ( $\text{Log}_2$  Fold Change) for all expressed  
 1321 genes. Colored data points indicate PWS-imprinted genes (purple), ER chaperones  
 1322 (green), secreted proteins (pink), synaptotagmins involved in insulin secretion (yellow),  
 1323 proteins involved in neuronal active zone/exocytosis and vesicle acidification (blue), and  
 1324 all other significant genes (red, without labels). **(C)** Gene set enrichment analysis

1325 identifies key biological pathways involved in protein processing and the unfolded stress  
1326 response in the ER. **(D-H)** Relative gene expression of control (Con, black; 5-9, 2, 16) vs.  
1327 PWS (red; 3, 19-1, 19-4) determined by RT-ddPCR normalized to *Gpi* levels and to the  
1328 average expression in control INS-1 lines, including for **(D)** *Gapdh* and *Snord116* (PWS)  
1329 control genes, **(E)** ten downregulated DEGs encoding ER chaperones, **(F)** endogenous  
1330 *Rattus norvegicus* (Rn) genes encoding  $\beta$ -cell hormones and secretory proteins, **(G)**  
1331 exogenous insulin transgenes in the INS-1 lines (*Mm*, *Mus musculus*; *Hs*, *Homo sapiens*)  
1332 as well as mCherry and neomycin resistance (*NeoR*) marker proteins, and **(H)**  
1333 upregulated DEGs involved in the secretory pathway. Statistical comparison by Welch's  
1334 t-test: \*,  $P < 0.05$ ; \*\*,  $P < 0.005$ ; \*\*\*,  $P < 0.0005$ ; \*\*\*\*,  $P < 0.00005$ .

1335 **Figure 5:**  
1336

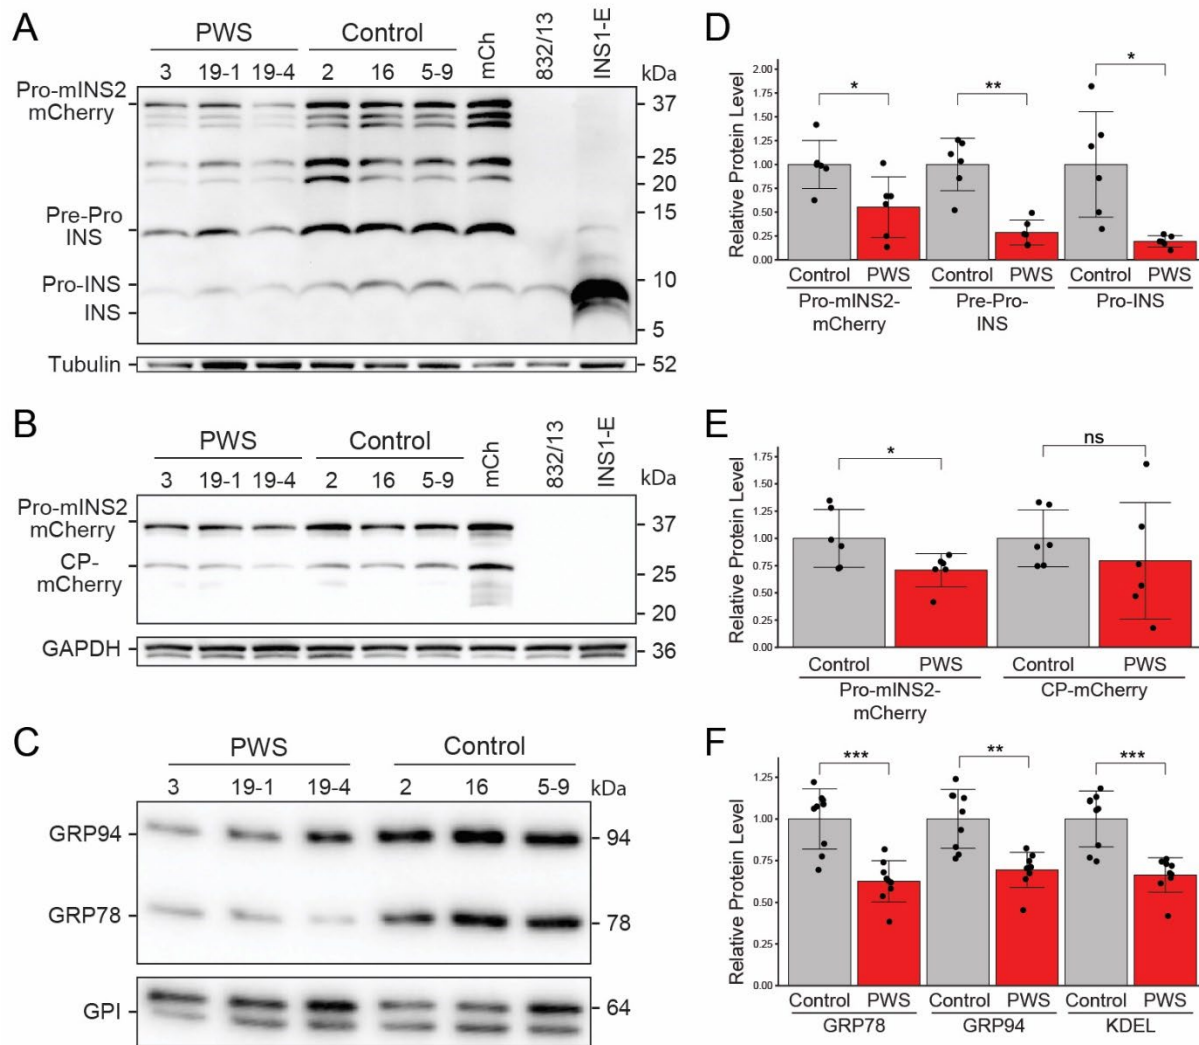

1337

1338 **Figure 5. Reductions in insulins and ER chaperone levels in PWS-deletion vs.**  
1339 **control INS-1 lines. (A-C)** Western blots of whole cell lysates from PWS (3, 19-1, 19-4)  
1340 and control (5-9, 2, 16) INS-1  $\beta$ -cell lines grown under control (DMSO) conditions for 5 h  
1341 were assessed using a panel of antibodies. **(A)** Anti-insulin, detecting all cellular forms of  
1342 insulin (Pre-Pro-, Pro-, and fully processed rat INS) as well as mouse proinsulin2 (Pro-  
1343 mINS2)-mCherry. **(B)** Anti-mCherry, detecting mouse proinsulin2 (Pro-mINS2)-mCherry  
1344 and C-peptide (CP)-mCherry. **(C)** Anti-KDEL, detecting the two major ER chaperones  
1345 GRP94 (endoplasmic; HSP90B1) and GRP78 (BiP; HSPA5). Anti- $\alpha$ -Tubulin, anti-  
1346 GAPDH, and anti-GPI were used as controls for protein loading levels in **(A)**, **(B)**, and  
1347 **(C)**, respectively. For **(A)** and **(B)**, control cell lines included INS-1::mCherry (mCh), INS-  
1348 1(832/13) parental, and INS1-E. **(D)** Quantitation of Pro-mINS2-mCherry, Pre-Pro-INS  
1349 and Pro-INS detected with anti-insulin in the PWS and control INS-1 lines (n=6 each  
1350 genotype). **(E)** Quantitation of Pro-mINS2-mCherry and CP-mCherry detected with anti-  
1351 mCherry in the PWS and control INS-1 lines (n=6 each). **(F)** Quantitation of GRP78,  
1352 GRP94, and total KDEL detected with anti-KDEL in the PWS and control INS-1 lines (n=9



1353 each). For **(D-F)**, statistical comparison by Welch's t-test: \*,  $P < 0.05$ ; \*\*,  $P < 0.005$ ; \*\*\*,  $P$   
1354  $< 0.0005$ ; ns, not significant.

1355 **Figure 6:**  
1356

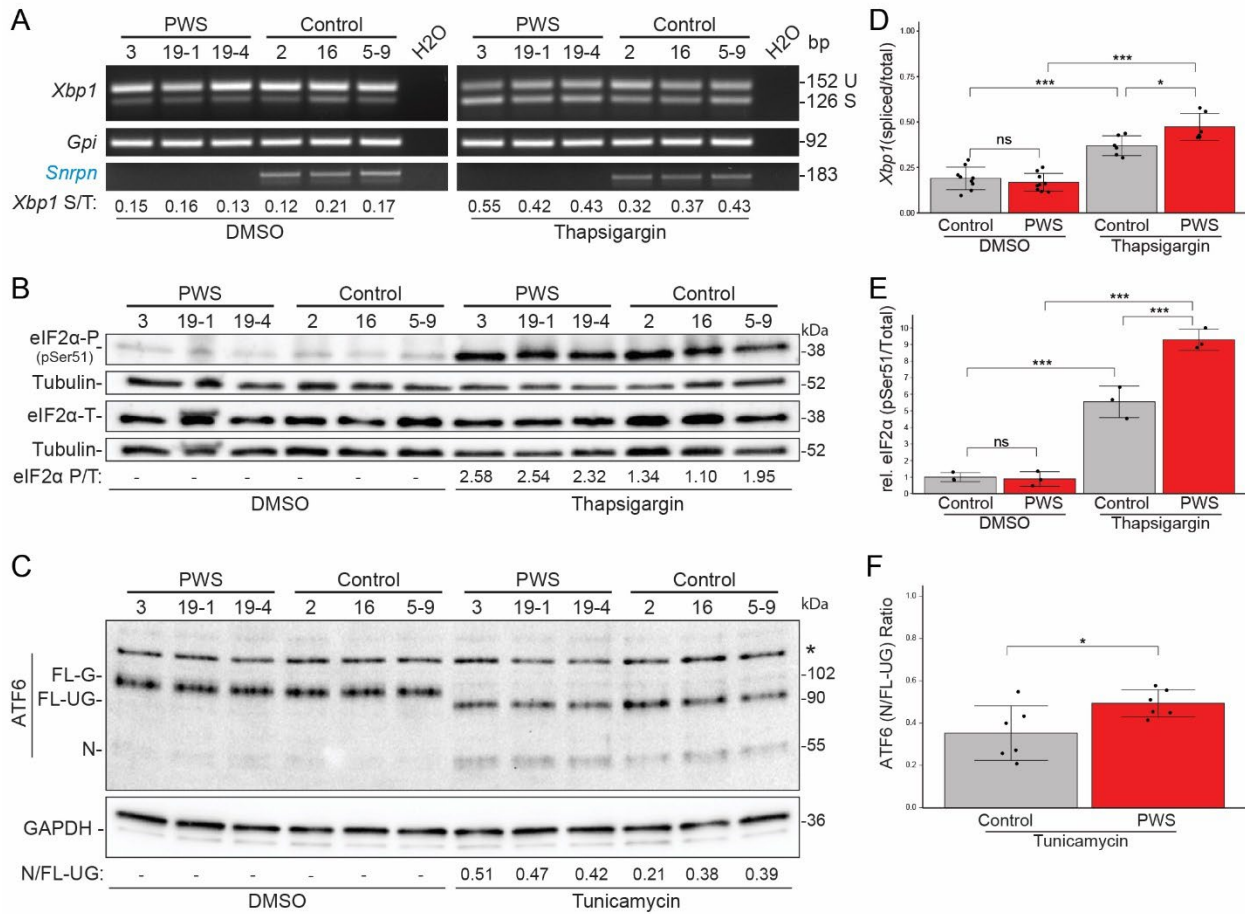

1357  
1358  
1359 **Figure 6. More sensitive activation of all three ER stress master regulatory**  
1360 **pathways in PWS-deletion vs. control INS-1  $\beta$ -cell lines.** (A) For the IRE1 $\alpha$  pathway,  
1361 we assessed its mRNA processing of *Xbp1* from unspliced (U) to spliced (S), with control  
1362 gene *Gpi* and PWS-*Snord116* also assayed by RT-PCR, using RNA from PWS (3, 19-1,  
1363 19-4) and control (5-9, 2, 16) INS-1 cell lines treated with DMSO or 0.1  $\mu$ M thapsigargin  
1364 for 3 h. At bottom, the *Xbp1* S/T (spliced/total) ratios for each cell line are shown, under  
1365 both control (DMSO) and ER stress (thapsigargin) conditions. (B) The PERK pathway  
1366 was assessed by comparison of total eIF2 $\alpha$  to PERK phosphorylated eIF2 $\alpha$ -P (pSer51),  
1367 using whole cell lysates from PWS and control INS-1 cell lines treated with DMSO or 0.1  
1368  $\mu$ M thapsigargin for 5 h. Anti- $\alpha$ TUB was used as a control for protein-loading levels. At  
1369 bottom, the eIF2 $\alpha$  P/T (phosphorylated/total) ratios for each cell line are shown under the  
1370 ER stress (thapsigargin) condition. (C) For the ATF6 pathway, we used whole cell lysates  
1371 from PWS and control INS-1 cell lines treated with DMSO or 10  $\mu$ g/ml tunicamycin for 5  
1372 h. Under control DMSO conditions, full-length (FL) and glycosylated (G) ATF6 of ~ 100-  
1373 kD is ER-localized. tunicamycin inhibits biosynthesis of N-linked glycans, resulting in  
1374 unglycosylated (UG) ATF6-FL of 90-kD in the ER, with proteolytic processing in the Golgi  
1375 to produce nuclear (N) ATF6-N of ~ 55-kD. \*, non-specific band detected by the anti-ATF6  
1376 antibody. Anti-GAPDH was used as a control for protein-loading levels. At bottom, the  
1377 ATF6 N/FL-UG (nuclear/FL-unglycosylated) ratios for each cell line are shown under the

1378 ER stress (tunicamycin) condition. **(D)** Quantitation of the ratio of spliced/total (S/T) *Xbp1*  
1379 mRNA in the PWS and control INS-1 lines under control (DMSO; n=9 each genotype)  
1380 and thapsigargin (3 h; n=6 each) conditions. PWS  $\beta$ -cells are more sensitive to  
1381 thapsigargin-induced ER stress with earlier and more robust activation of *Xbp1* mRNA  
1382 “splicing” than control cell lines. **(E)** Quantitation of the relative (rel.) level of  
1383 phosphorylated (pSer51) to total eIF2 $\alpha$  in the PWS and control INS-1 lines (n=3 each)  
1384 under control (DMSO) and thapsigargin conditions. PWS cells are more sensitive to  
1385 thapsigargin-induced ER stress with more robust activation of eIF2 $\alpha$  phosphorylation. **(F)**  
1386 Quantitation of the ratio of nuclear/FL-unglycosylated (N/UG) for ATF6 in the PWS and  
1387 control INS-1 lines under ER stress (tunicamycin) conditions (n=6 each, from two  
1388 biological replicates). PWS cells are more sensitive to tunicamycin-induced ER stress  
1389 with more robust activation of ATF6-N. For **(D-E)**, statistical comparison by ANOVA and  
1390 for **(F)** by Welch’s t-test with Tukey’s HSD post-hoc: \*,  $P < 0.05$ ; \*\*,  $P < 0.005$ ; \*\*\*,  $P <$   
1391 0.0005; ns, not significant.
